# Supplementary material for: Discovery and Features of an Alkylating Signature in Colorectal Cancer
Source: Oxford University Press journal article supplement (doi:10.1158/2159-8290.cd-20-1656), 2021-06-17
Supplement: 21598290cd201656-sup-255495_3_supp_7130528_qtdtvk.xlsx [file 21598290cd201656-sup-255495_3_supp_7130528_qtdtvk.xlsx]

## Sheet: Table S1
Table S1: Clinicopathologic Features of the NHS and HPFS Patients and Tumors
ID	Cohort	Age	Sex	Stage	Site	Microsatellite status
T1155	NHS	68.25	Female	I	Left	MSS
T82	NHS	69.8333	Female	II	Left	MSS
T77	NHS	68.75	Female	II	Left	MSI
T573	HPFS	71	Male	II	Left	MSS
T185	NHS	68.4167	Female	NA	Right	MSS
T592	HPFS	61.3333	Male	I	Right	MSI
T639	HPFS	85.75	Male	II	Left	MSS
T183	NHS	57.3333	Female	IV	Left	MSS
T278	NHS	58.5	Female	I	Right	MSS
T1237	NHS	74.25	Female	II	Left	MSI
T409	NHS	60.5833	Female	IV	Right	MSS
T2183	HPFS	73.9167	Male	II	Left	MSS
T516	HPFS	65	Male	II	Left	MSS
T562	HPFS	57.4167	Male	I	Left	MSS
T597	HPFS	62.4167	Male	II	Right	MSS
T87	NHS	56.5	Female	II	Right	MSS
T2267	HPFS	56.5833	Male	I	Right	MSS
T495	HPFS	67.0833	Male	IV	Left	MSS
T563	HPFS	50.0833	Male	III	Right	MSS
T3697	NHS	75.3333	Female	II	Left	MSS
T3082	NHS	66.4167	Female	I	Left	MSS
T1841	HPFS	81	NA	NA	Left	MSS
T451	HPFS	73.1667	Male	NA	Left	MSS
T679	HPFS	69.75	Male	II	Right	MSS
T574	HPFS	64.5	Male	II	Right	MSS
T4492	HPFS	80.5	Male	IV	Right	NA
T246	NHS	60.1667	Female	III	Right	MSS
T238	NHS	61.4167	Female	NA	Right	MSS
T10	NHS	71.8333	Female	II	Right	MSS
T2774	NHS	80.1667	Female	NA	Left	NA
T2296	HPFS	74.5	Male	I	Left	MSS
T3241	HPFS	61.5	Male	III	Left	MSS
T286	NHS	67	Female	I	Left	MSS
T3537	HPFS	75.6667	Male	NA	Right	MSS
T360	NHS	64.4167	Female	III	Left	MSS
T635	HPFS	55.25	Male	II	Left	MSS
T2930	NHS	78.6667	Female	III	Right	MSS
T276	NHS	69.75	Female	III	Left	MSI
T28	NHS	59.5833	Female	NA	Right	MSS
T61	NHS	64.5	Female	III	Right	MSS
T3337	HPFS	68.0833	Male	III	Right	MSS
T2421	NHS	70.0833	Female	III	Right	MSS
T206	NHS	59.1667	Female	II	Right	MSS
T2950	NHS	82.75	Female	II	Right	MSI
T211	NHS	61.4167	Female	II	Left	MSS
T85	NHS	46.8333	Female	I	Left	MSS
T2639	NHS	54.5	Female	IV	Left	MSS
T58	NHS	74.0833	Female	II	Left	MSS
T3220	HPFS	80.0833	Male	III	Right	MSS
T2399	NHS	63.9167	Female	IV	Left	MSS
T3151	HPFS	63.1667	Male	III	Right	MSS
T1192	NHS	59.9167	Female	III	Right	MSS
T3428	HPFS	83.6667	Male	II	Right	MSS
T1243	NHS	68.25	Female	III	Right	MSS
T347	NHS	61.3333	Female	II	Left	MSS
T1233	NHS	67.4167	Female	I	Right	MSS
T226	NHS	70.4167	Female	NA	Right	MSS
T3145	HPFS	70.6667	Male	II	Left	MSS
T2341	NHS	67.5	Female	I	Right	MSS
T530	HPFS	57	NA	NA	NA	MSS
T166	NHS	64.25	Female	II	Left	MSI
T2337	NHS	54.1667	Female	III	Right	NA
T588	HPFS	63	Male	I	Right	MSS
T389	NHS	61.1667	Female	I	Left	MSS
T2275	HPFS	59.6667	Male	III	Left	MSI
T478	HPFS	64.25	Male	NA	Right	MSS
T1201	NHS	61.6667	Female	III	Right	MSS
T139	NHS	68.0833	Female	IV	Left	MSS
T198	NHS	60.6667	Female	IV	Right	MSS
T435	HPFS	55.9167	Male	I	Left	MSS
T3447	HPFS	64.0833	Male	III	Right	MSS
T425	HPFS	69.5	Male	III	Right	MSS
T125	NHS	75.1667	Female	III	Right	MSS
T322	NHS	70	Female	III	Left	MSS
T533	HPFS	65.1667	Male	III	Right	MSS
T141234	NHS	73.3333	Female	I	Left	MSS
T3667	NHS	63	Female	II	Right	MSS
T3689	NHS	80.3333	Female	I	Left	MSS
T512	HPFS	63.9167	Male	II	Left	MSS
T3684	HPFS	69.75	Male	I	Right	MSS
T3315	HPFS	81.3333	Male	IV	Left	MSS
T379	NHS	70.9167	Female	II	Right	MSS
T575	HPFS	74.4167	Male	III	Right	MSS
T646	HPFS	57.5	Male	I	Right	MSS
T634	HPFS	75.5833	Male	III	Right	MSS
T3189	HPFS	84.9167	Male	IV	Left	MSS
T2578	NHS	70.5833	Female	II	Right	MSS
T4652	NHS2	54.5833	Female	II	Left	NA
T91	NHS	63.5833	Female	I	Left	MSS
T673	HPFS	60.25	Male	I	Right	MSS
T3050	NHS	62.6667	Female	III	Left	NA
T2407	NHS	67.0833	Female	III	Left	MSS
T1199	NHS	57.4167	Female	II	Right	MSS
T2195	HPFS	80	NA	NA	Left	MSS
T109	NHS	61.25	Female	II	Right	MSS
T549	HPFS	67.3333	Male	II	Right	MSS
T291	NHS	66.5833	Female	I	Left	MSI
T3221	HPFS	77.3333	Male	II	Right	MSS
T31	NHS	69.0833	Female	III	Left	MSS
T4730	NHS	83.5	Female	III	Right	NA
T1178	NHS	71.5833	Female	III	Right	MSS
T272	NHS	59.0833	Female	III	Right	MSS
T3410	HPFS	67.5833	Male	II	Right	NA
T3254	NHS	67.0833	Female	III	Right	MSS
T2671	HPFS	62.5	Male	NA	Right	MSS
T2202	HPFS	65.1667	Male	III	Right	MSS
T3299	HPFS	82.5	Male	II	Right	MSS
T96	NHS	61	Female	I	Right	MSS
T486	HPFS	63	NA	NA	Right	MSS
T446	HPFS	64.5	Male	I	Right	MSS
T270	NHS	39.9167	Female	III	Right	MSS
T222	NHS	66.5	Female	III	Right	MSS
T21	NHS	55.75	Female	II	Right	MSS
T3018	NHS	79.5	Female	I	Left	MSI
T524	HPFS	73.25	Male	II	Left	MSS
T2667	HPFS	65.0833	Male	II	Right	MSS
T133	NHS	63.9167	Female	II	Left	MSS
T339	NHS	51.8333	Female	II	Left	MSS
T3124	HPFS	76.75	Male	II	Left	MSS
T2699	NHS	72.9167	Female	I	Right	MSS
T90	NHS	64.75	Female	I	Left	MSS
T262	NHS	68.0833	Female	I	Right	MSS
T413	NHS	70.3333	Female	I	Left	MSS
T3727	NHS	70.75	Female	I	Left	NA
T3219	HPFS	71.9167	Male	NA	Left	MSI
T3409	HPFS	66.9167	Male	IV	Left	MSS
T528	HPFS	68.3333	Male	II	Left	MSS
T76	NHS	60.75	Female	II	Left	MSI
T1764	HPFS	81.5833	Male	I	Right	MSS
T1211	NHS	72.75	Female	II	Left	MSI
T1749	HPFS	61.8333	Male	IV	Left	MSS
T3311	HPFS	73.4167	Male	II	Right	MSS
T89	NHS	66.0833	Female	IV	Right	MSS
T383	NHS	58.0833	Female	II	Left	MSS
T2979	NHS	70.5833	Female	I	Left	MSS
T38	NHS	68.1667	Female	IV	Right	MSS
T3449	HPFS	84.75	Male	NA	Right	MSS
T14	NHS	57.8333	Female	IV	Right	MSS
T256	NHS	67	Female	IV	Left	MSS
T3520	HPFS	79.1667	Male	I	Right	MSS
T2948	NHS	73.6667	Female	II	Right	MSS
T2457	NHS	75.0833	Female	IV	Left	MSS
T1216	NHS	56	Female	IV	Right	MSS
T593	HPFS	67.5	Male	II	Right	NA
T101	NHS	69.3333	Female	III	Right	MSS
T2434	NHS	56.4167	Female	III	Right	MSS
T24	NHS	68.8333	Female	I	Right	MSS
T2354	NHS	73.0833	Female	I	Right	MSI
T224049	NHS	84.9167	Female	NA	Right	MSI
T3304	HPFS	71.9167	Male	I	Right	MSS
T108	NHS	54.5833	Female	III	Right	MSS
T497	HPFS	71.3333	Male	III	Left	MSS
T3405	NHS	80	Female	I	Left	NA
T92	NHS	67.3333	Female	II	Left	MSI
T2252	HPFS	68.9167	Male	IV	Right	MSS
T2443	NHS	52.25	Female	III	Right	MSS
T2281	HPFS	80.25	Male	II	Left	MSI
T3184	HPFS	77	Male	III	Left	MSS
T113	NHS	70.5833	Female	II	Right	MSS
T3181	HPFS	77.0833	Male	I	Left	MSI
T687	HPFS	66.25	Male	III	Left	MSS
T2392	NHS	64.0833	Female	I	Right	MSS
T4732	NHS2	52.5833	Female	III	Right	NA
T112	NHS	62.0833	Female	III	Right	MSS
T2265	HPFS	63.6667	Male	III	Left	MSS
T4538	HPFS	62.9167	Male	III	Right	MSS
T73	NHS	65.3333	Female	III	Left	MSS
T3234	HPFS	85.8333	Male	I	Right	MSS
T86	NHS	47.1667	Female	I	Left	MSS
T1183	NHS	76.75	Female	III	Right	MSS
T3397	HPFS	79.25	Male	III	Right	MSS
T3316	HPFS	75.5	Male	NA	Right	MSS
T1797	HPFS	79.8333	Male	NA	Right	MSS
T2369	NHS	47.9167	Female	III	Right	MSS
T1205	NHS	58.8333	Female	IV	Left	MSS
T419	HPFS	67.8333	Male	II	Left	MSS
T241	NHS	70.4167	Female	III	Right	MSS
T287	NHS	59.5	Female	III	Left	MSS
T3232	HPFS	80	Male	I	Right	MSS
T674	HPFS	79.6667	Male	III	Right	MSS
T3172	HPFS	74.6667	Male	IV	Left	MSS
T390	NHS	52.3333	Female	III	Left	MSI
T4681	NHS2	50.8333	Female	III	Left	NA
T4733	NHS2	56.1667	Female	II	Left	NA
T255	NHS	64	Female	III	Right	MSS
T519	HPFS	80.9167	Male	III	Left	MSS
T2582	NHS	71.8333	Female	IV	Left	MSS
T3489	HPFS	61.8333	Male	NA	Right	MSS
T3683	NHS	78	Female	III	Right	MSS
T43	NHS	42.0833	Female	I	Right	MSS
T253	NHS	70.5	Female	II	Left	MSS
T655	HPFS	64.0833	Male	III	Left	MSS
T3680	NHS	85.3333	Female	I	Left	MSS
T2641	NHS	74.6667	Female	II	Right	MSI
T556	HPFS	72.0833	Male	IV	Left	MSS
T106	NHS	67.4167	Female	I	Left	MSS
T2388	NHS	47.25	Female	III	Right	MSS
T496	HPFS	49	Male	I	Right	MSS
T559	HPFS	54.9167	Male	III	Right	MSS
T304	NHS	59.3333	Female	I	Right	MSI
T3439	HPFS	80.25	Male	I	Right	MSS
T3194	HPFS	72.25	Male	IV	Right	MSS
T2269	HPFS	73	Male	I	Right	MSS
T3011	NHS	69.6667	Female	II	Left	MSS
T2429	NHS	59.1667	Female	I	Right	MSS
T2427	NHS	71.5833	Female	I	Right	MSS
T358480	NHS	73.25	Female	II	Left	MSS
T606	HPFS	74.75	Male	III	Left	MSS
T684	HPFS	67.25	Male	I	Left	MSS
T111	NHS	71.3333	Female	I	Left	MSI
T3140	HPFS	73.8333	Male	IV	Right	MSS
T1221	NHS	77.6667	Female	IV	Left	MSS
T1230	NHS	62.25	Female	I	Right	MSI
T81	NHS	65.6667	Female	IV	Left	MSS
T316	NHS	70.0833	Female	I	Right	MSS
T429	HPFS	77.75	Male	II	Right	MSS
T2423	NHS	59.3333	Female	II	Right	MSS
T657	HPFS	59.5833	Male	I	Right	MSS
T276701	NHS	64.3333	Female	I	Left	MSS
T1222	NHS	71.9167	Female	II	Left	MSI
T645	HPFS	73.5833	Male	I	Right	MSS
T1227	NHS	62.6667	Female	II	Right	MSS
T3049	NHS	74.4167	Female	I	Left	MSI
T1195	NHS	64.6667	Female	III	Left	MSS
T2416	NHS	70.9167	Female	II	Left	MSS
T693	HPFS	65.4167	Male	II	Left	MSS
T3227	HPFS	77.5833	Male	III	Right	MSS
T240	NHS	72.5	Female	IV	Right	MSS
T491	HPFS	64.4167	Male	II	Right	MSS
T3101	NHS	76	Female	III	Right	MSS
T60	NHS	62.75	Female	I	Left	MSI
T3170	HPFS	76.6667	Male	III	Left	MSS
T3269	NHS	69.1667	Female	II	Left	MSI
T492	HPFS	66.1667	Male	IV	Left	MSI
T54	NHS	64.4167	Female	IV	Left	MSI
T307	NHS	70.25	Female	IV	Left	MSS
T442	HPFS	72.5	Male	II	Left	MSS
T1246	NHS	70.6667	Female	III	Right	MSS
T2946	NHS	78.6667	Female	II	Left	MSI
T2214	HPFS	76.8333	Male	IV	Left	MSS
T2288	HPFS	66.6667	Male	IV	Left	MSS
T1747	HPFS	77.3333	Male	III	Right	MSS
T4720	NHS2	59.3333	Female	II	Left	NA
T197	NHS	67.5833	Female	II	Left	MSI
T330	NHS	65	Female	II	Right	MSS
T2410	NHS	51.8333	Female	II	Left	MSS
T213	NHS	61.25	Female	III	Left	MSS
T3666	NHS	66	Female	II	Left	MSI
T620	HPFS	60.75	Male	III	Right	MSS
T1193	NHS	64.0833	Female	III	Left	MSS
T1755	HPFS	74.8333	Male	IV	Left	MSS
T3048	NHS	73.1667	Female	I	Left	MSS
T50	NHS	58.25	Female	I	Right	MSS
T3432	HPFS	66.1667	Male	NA	Left	NA
T33	NHS	58.8333	Female	IV	Left	MSS
T692	HPFS	61.1667	Male	II	Right	MSS
T3496	HPFS	90.8333	Male	NA	Left	MSS
T3010	NHS	74.0833	Female	II	Left	NA
T1767	HPFS	76	NA	NA	Right	MSS
T228	NHS	69.25	Female	III	Left	MSS
T481	HPFS	64.4167	Male	IV	Left	MSS
T2674	HPFS	72.4167	Male	I	Left	MSS
T615	HPFS	61.1667	Male	III	Left	MSS
T546	HPFS	69.9167	Male	IV	Left	MSI
T3248	HPFS	72.75	Male	III	Left	MSI
T1245	NHS	56.25	Female	III	Right	MSS
T2936	NHS	67	Female	II	Left	MSI
T2262	HPFS	76.0833	Male	NA	Right	MSS
T3440	HPFS	86	Male	III	Left	MSS
T3123	HPFS	75.6667	Male	IV	Right	MSS
T1241	NHS	68	Female	II	Left	MSI
T607	HPFS	68.0833	Male	III	Right	MSS
T63	NHS	63.4167	Female	NA	Left	MSI
T1160	NHS	72	Female	III	Right	MSS
T4723	NHS2	60.25	Female	I	Left	NA
T344	NHS	53.3333	Female	III	Left	MSS
T1202	NHS	58	Female	I	Left	MSI
T1803	HPFS	63	NA	NA	Right	MSS
T4724	NHS2	52.6667	Female	III	Right	NA
T1798	HPFS	75.75	Male	I	Right	MSS
T30	NHS	73.75	Female	I	Left	MSS
T3237	HPFS	85.1667	Male	I	Left	MSS
T2762	NHS	75.8333	Female	III	Left	MSI
T250	NHS	56.6667	Female	II	Left	MSS
T197908	NHS	83.3333	Female	III	Left	MSS
T4705	NHS2	58.3333	Female	IV	Right	NA
T1167	NHS	68.75	Female	II	Left	MSS
T647	HPFS	72.9167	Male	I	Left	MSS
T2257	HPFS	79.5	Male	II	Left	MSI
T4665	NHS2	58.5	Female	II	Left	NA
T3704	NHS	71	Female	II	Left	MSI
T55	NHS	62.1667	Female	II	Left	MSI
T2397	NHS	68.3333	Female	I	Left	MSS
T378	NHS	64.6667	Female	II	Left	MSS
T4437	HPFS	75	Male	I	Left	NA
T3209	HPFS	67.25	Male	III	Right	MSS
T1204	NHS	65.75	Female	III	Right	MSS
T4739	HPFS	80.5	Male	NA	Right	NA
T331889	NHS	79.25	Female	II	Left	MSI
T2398	NHS	70.6667	Female	II	Right	MSS
T640	HPFS	52.5	Male	III	Right	MSS
T366793	NHS	68.5	Female	III	Right	MSS
T3430	HPFS	65.25	Male	II	Right	MSS
T123338	NHS	79.5	Female	II	Right	MSS
T663	HPFS	71	NA	NA	Right	MSS
T2934	NHS	68.25	Female	I	Right	MSS
T466	HPFS	57.3333	Male	III	Left	MSS
T2259	HPFS	75.3333	Male	I	Left	MSS
T3604	HPFS	84.25	Male	II	Left	MSS
T295702	NHS	69	Female	I	Left	MSS
T356	NHS	59.5833	Female	NA	Right	MSS
T3527	HPFS	73.9167	Male	III	Right	MSS
T1161	NHS	63.9167	Female	II	Right	MSI
T311196	NHS	68.1667	Female	II	Right	MSS
T3288	HPFS	60.1667	Male	III	Right	MSS
T3330	NHS	80.25	Female	III	Left	MSS
T1848	HPFS	77.8333	Male	II	Left	MSS
T1191	NHS	76.6667	Female	I	Right	MSS
T293	NHS	72.25	Female	II	Left	MSI
T3102	HPFS	80.5833	Male	I	Left	MSS
T83	NHS	63.0833	Female	I	Right	MSI
T2359	NHS	57.3333	Female	I	Left	MSS
T3016	NHS	78.4167	Female	II	Left	MSS
T691	HPFS	65.5833	Male	II	Right	MSS
T353	NHS	62.8333	Female	III	Right	MSS
T3104	HPFS	54.5833	Male	IV	Left	NA
T116	NHS	52.5833	Female	NA	Right	MSS
T2394	NHS	71	Female	III	Right	MSS
T3305	HPFS	79.8333	Male	IV	Right	MSS
T477	HPFS	70.6667	Male	NA	Right	MSS
T2564	NHS	62.75	Female	II	Left	MSI
T3169	HPFS	77.9167	Male	IV	Right	MSS
T1791	HPFS	68.3333	Male	III	Left	MSI
T4565	NHS	74.5833	Female	III	Right	NA
T344232	NHS	75	Female	II	Right	MSS
T2621	NHS	63.75	Female	I	Right	MSS
T3660	NHS	68.25	Female	II	Right	MSS
T1262	HPFS	61.0833	Male	I	Right	MSS
T2647	NHS	68	Female	I	Right	MSS
T2565	NHS	66.25	Female	I	Right	MSS
T587	HPFS	60.75	Male	II	Right	MSS
T1794	HPFS	85.75	Male	I	Left	MSS
T2952	NHS	74.0833	Female	II	Left	NA
T229	NHS	65.8333	Female	I	Right	MSS
T662	HPFS	68.75	Male	NA	Right	MSS
T437	HPFS	54.0833	Male	III	Left	MSS
T444	HPFS	71	Male	III	Right	MSS
T610	HPFS	69.25	Male	I	Right	MSS
T2366	NHS	61.3333	Female	III	Right	MSS
T3398	HPFS	75.1667	Male	III	Right	MSS
T1742	HPFS	64	Male	IV	Right	MSS
T305	NHS	66.6667	Female	III	Right	MSS
T2775	NHS	74.9167	Female	IV	Left	MSS
T2445	NHS	64.25	Female	III	Right	MSS
T407	NHS	69.1667	Female	II	Left	MSI
T2323	HPFS	79	NA	NA	Left	MSS
T261	NHS	69.8333	Female	II	Left	MSI
T3178	HPFS	71.3333	Male	NA	Right	MSS
T3235	HPFS	86	Male	I	Left	MSS
T504	HPFS	76.4167	Male	III	Left	MSS
T93	NHS	68.4167	Female	III	Right	MSS
T365383	NHS	70.4167	Female	II	Left	NA
T195	NHS	71.9167	Female	I	Left	MSS
T1771	HPFS	73.1667	Male	III	Left	MSS
T3485	HPFS	69	Male	I	Right	MSS
T2992	NHS	67.3333	Female	III	Left	MSS
T3706	NHS	61.1667	Female	III	Right	MSS
T2303	HPFS	60.0833	Male	II	Left	MSS
T3651	NHS	84.1667	Female	III	Right	MSS
T3270	NHS	76.75	Female	II	Right	MSS
T4671	NHS2	56.6667	Female	II	Right	NA
T308390	NHS	76.75	Female	I	Right	MSS
T1759	HPFS	87.1667	Male	II	Right	MSS
T627	HPFS	70.8333	Male	I	Right	MSS
T2220	HPFS	80	NA	NA	Left	MSS
T3529	HPFS	58	NA	NA	Right	MSS
T1745	HPFS	83.75	Male	I	Left	MSS
T3421	HPFS	82.0833	Male	II	Left	NA
T2270	HPFS	78.8333	Male	NA	Left	MSS
T3407	HPFS	80.75	Male	II	Left	NA
T402	NHS	64.1667	Female	IV	Right	MSS
T3637	HPFS	70.4167	Male	III	Left	MSS
T621	HPFS	79.75	Male	II	Left	MSS
T471	HPFS	68	Male	I	Right	MSS
T223	NHS	61.5	Female	I	Right	MSS
T2370	NHS	58.25	Female	III	Left	MSS
T3312	HPFS	70	Male	III	Right	MSS
T2812	HPFS	77.9167	Male	IV	Left	MSS
T3253	NHS	72	Female	II	Left	MSS
T631	HPFS	74.9167	Male	III	Right	MSS
T183221	NHS	73.5	Female	IV	Right	MSS
T1254	NHS	77.3333	Female	II	Right	MSS
T3661	HPFS	84.3333	Male	II	Left	MSI
T3484	HPFS	81.5	Male	II	Right	MSS
T4700	NHS2	53.0833	Female	III	Right	NA
T32	NHS	64.3333	Female	NA	Left	MSS
T354	NHS	63.9167	Female	II	Left	MSI
T3673	NHS	75.6667	Female	III	Left	MSS
T3621	HPFS	69.9167	Male	NA	Right	MSS
T1250	NHS	78.4167	Female	III	Right	MSS
T207430	NHS	84.5	Female	II	Left	MSI
T3480	HPFS	62.6667	Male	NA	Right	MSS
T3059	NHS	67.75	Female	III	Right	MSS
T4683	NHS2	51.3333	Female	II	Left	NA
T2227	HPFS	70	NA	NA	Left	MSI
T1756	HPFS	67.8333	Male	III	Right	MSS
T650	HPFS	70.6667	Male	III	Right	MSS
T1197	NHS	56.75	Female	IV	Right	MSS
T1212	NHS	67	Female	II	Left	MSI
T374	NHS	66.75	Female	I	Right	MSS
T3057	NHS	67	Female	IV	Left	MSS
T523	HPFS	73.75	Male	II	Left	MSI
T202	NHS	53.8333	Female	III	Right	MSS
T3431	HPFS	76.6667	Male	I	Right	NA
T2454	HPFS	66.8333	Male	II	Right	MSS
T306	NHS	71.3333	Female	II	Right	MSS
T4688	NHS2	51.25	Female	IV	Left	NA
T2266	HPFS	78.6667	Male	NA	Left	MSS
T2406	NHS	58.3333	Female	II	Right	MSS
T3700	NHS	81.9167	Female	III	Left	MSI
T1846	HPFS	79.1667	Male	I	Right	MSS
T3528	HPFS	83.5833	Male	NA	Right	MSS
T2928	NHS	67.3333	Female	I	Right	MSS
T2981	NHS	77	Female	II	Left	MSI
T280	NHS	65.1667	Female	II	Right	MSS
T1251	NHS	63	Female	III	Left	MSS
T102	NHS	72.6667	Female	II	Left	MSI
T2284	HPFS	56.3333	Male	III	Right	MSS
T3204	HPFS	71.0833	Male	I	Left	MSS
T561	HPFS	79	NA	NA	Right	MSS
T229051	NHS	77.9167	Female	II	Left	MSS
T1196	NHS	70.8333	Female	NA	Right	MSS
T3415	HPFS	63.75	Male	III	Right	MSS
T1157	NHS	75.75	Female	I	Left	MSS
T3677	NHS	69.0833	Female	III	Right	MSS
T258	NHS	57.5833	Female	III	Left	MSS
T683	HPFS	60.4167	Male	IV	Right	MSS
T405	NHS	51.5	Female	III	Right	MSS
T3672	NHS	66.1667	Female	II	Right	MSS
T1244	NHS	62.75	Female	II	Left	MSS
T3167	HPFS	85	Male	NA	Right	MSS
T4441	HPFS	70.1667	Male	II	Left	NA
T688	HPFS	46	Male	II	Right	MSS
T3653	NHS	70.0833	Female	I	Left	MSI
T3417	HPFS	68.5	Male	III	Right	NA
T458	HPFS	74.3333	Male	III	Left	MSI
T3546	HPFS	65.0833	Male	I	Right	MSS
T4712	HPFS	62.0833	Male	NA	Right	NA
T3665	NHS	80.25	Female	III	Left	MSS
T68	NHS	60.3333	Female	I	Left	MSI
T3640	NHS	71.5	Female	II	Left	MSI
T3563	HPFS	66.8333	Male	NA	Right	MSS
T485	HPFS	62.0833	Male	I	Right	MSS
T1165	NHS	63	Female	I	Right	MSS
T1239	NHS	65.25	Female	II	Left	MSS
T237969	NHS	88.5833	Female	I	Left	MSS
T680	HPFS	74.25	Male	NA	Right	MSS
T4657	NHS2	53.4167	Female	III	Right	NA
T3004	NHS	79.6667	Female	III	Right	NA
T3696	NHS	82.4167	Female	II	Left	MSI
T299	NHS	54.5	Female	I	Left	MSS
T103320	NHS	71.0833	Female	II	Left	MSS
T134258	NHS	73.0833	Female	I	Left	MSI
T1844	HPFS	72.5833	Male	III	Left	MSS
T2447	NHS	63.75	Female	I	Right	MSS
T227039	NHS	82.3333	Female	II	Left	MSI
T4658	NHS2	60.3333	Female	II	Right	NA
T343654	NHS	85.5833	Female	I	Left	MSS
T328	NHS	68.3333	Female	IV	Left	MSS
T3512	HPFS	65.8333	Male	III	Left	MSS
T3242	HPFS	59.25	Male	III	Right	NA
T3058	NHS	79.6667	Female	III	Right	NA
T3340	HPFS	67	Male	I	Left	MSS
T3008	NHS	74.9167	Female	III	Left	MSS
T542	HPFS	67	Male	NA	Right	MSS
T3249	HPFS	63.6667	Male	I	Left	MSI
T352983	NHS	72	Female	I	Left	MSI
T3025	NHS	77.0833	Female	II	Left	MSI
T4651	NHS2	50.3333	Female	III	Left	NA
T2379	NHS	67.1667	Female	II	Left	MSI
T275	NHS	65.1667	Female	II	Right	MSS
T4682	NHS2	53.4167	Female	III	Right	NA
T3646	NHS	65.8333	Female	II	Left	MSI
T3450	HPFS	75.4167	Male	I	Right	MSS
T3053	NHS	70.8333	Female	IV	Left	MSS
T70	NHS	65.3333	Female	III	Right	MSS
T418	HPFS	57.4167	Male	IV	Right	MSS
T164221	NHS	72.6667	Female	II	Right	MSS
T3225	HPFS	56.5	Male	I	Right	MSI
T353622	NHS	64.5833	Female	I	Right	MSS
T3624	HPFS	87.25	Male	NA	Left	MSI
T1762	HPFS	69.5833	Male	II	Right	MSI
T346942	NHS	69.4167	Female	I	Right	MSS
T2458	NHS	62.6667	Female	II	Right	MSS
T2976	NHS	75.6667	Female	III	Left	MSS
T677	HPFS	70.6667	Male	III	Right	MSS
T3678	NHS	78.8333	Female	II	Right	MSS
T2763	NHS	57.25	Female	IV	Right	MSS
T3265	NHS	74.9167	Female	II	Right	MSS
T3191	HPFS	76.9167	Male	I	Right	MSS
T2932	NHS	78.0833	Female	I	Left	MSI
T277	NHS	59.6667	Female	II	Left	MSS
T3542	HPFS	79.5833	Male	II	Left	MSS
T4536	HPFS	72.6667	Male	III	Right	MSS
T2271	HPFS	56.1667	Male	II	Left	MSS
T2808	NHS	67.9167	Female	IV	Left	NA
T2304	HPFS	77	Male	I	Left	MSS
T660	HPFS	66.5833	Male	I	Left	MSS
T2364	NHS	69.9167	Female	III	Right	MSS
T603	HPFS	69.75	Male	II	Left	MSS
T2367	NHS	66.25	Female	IV	Left	MSS
T189255	NHS	77.1667	Female	II	Left	MSI
T3481	HPFS	81.4167	Male	I	Right	MSS
T3483	HPFS	82.8333	Male	IV	Right	MSS
T180077	NHS	73.5	Female	III	Right	MSS
T3022	NHS	74.8333	Female	I	Left	MSS
T132	NHS	69.1667	Female	II	Right	MSS
T4707	NHS2	57.6667	Female	I	Left	NA
T2767	NHS	75	Female	II	Right	MSS
T3712	NHS	64.3333	Female	NA	Right	MSS
T1231	NHS	73.5	Female	I	Left	MSI
T2279	HPFS	65.4167	Male	II	Right	MSS
T1225	NHS	75	Female	II	Left	MSI
T3506	HPFS	83.1667	Male	I	Right	MSS
T3718	NHS	72.8333	Female	NA	Right	MSI
T3334	HPFS	61.9167	Male	NA	Right	MSS
T352566	NHS	73.3333	Female	II	Right	MSI
T1804	HPFS	76.1667	Male	III	Right	MSS
T3020	NHS	56.8333	Female	IV	Left	MSS
T3670	NHS	85.8333	Female	II	Left	MSS
T230737	NHS	76.25	Female	II	Right	MSI
T18	NHS	59.0833	Female	I	Right	MSS
T1226	NHS	65.3333	Female	III	Right	MSS
T3444	HPFS	72.5833	Male	I	Left	NA
T463	HPFS	71.6667	Male	II	Left	MSS
T4662	NHS2	59.6667	Female	II	Right	NA
T1247	NHS	68.5	Female	I	Right	MSS
T295	NHS	72.75	Female	NA	Left	MSI
T2400	NHS	69.3333	Female	I	Right	MSS
T3523	HPFS	81.6667	Male	II	Left	MSS
T2984	NHS	77.8333	Female	III	Left	MSS
T2765	NHS	78.8333	Female	II	Left	MSS
T165	NHS	54.75	Female	II	Right	MSS
T3476	HPFS	84.3333	Male	III	Right	MSS
T1761	HPFS	78.9167	Male	I	Right	MSS
T2935	NHS	64.1667	Female	I	Right	MSS
T4629	NHS	73.75	Female	NA	Right	NA
T2439	NHS	71.8333	Female	II	Right	MSS
T311	NHS	68.75	Female	I	Right	MSS
T3692	HPFS	63.3333	Male	III	Right	MSS
T4669	NHS2	52.25	Female	III	Left	NA
T1206	NHS	72.3333	Female	III	Right	MSS
T46	NHS	51.4167	Female	I	Right	MSS
T3674	NHS	83.9167	Female	II	Left	MSS
T171816	NHS	84.8333	Female	I	Right	MSS
T498	HPFS	55.1667	Male	IV	Right	MSS
T2380	NHS	57.0833	Female	NA	Right	MSS
T160282	NHS	68.3333	Female	II	Left	MSS
T3029	NHS	68.25	Female	II	Left	NA
T3267	NHS	62	Female	I	Left	MSS
T2982	NHS	78.3333	Female	III	Left	MSS
T461	HPFS	76.6667	Male	I	Right	MSS
T2441	NHS	75	Female	I	Right	MSS
T3508	HPFS	69.8333	Male	NA	Left	MSS
T110220	NHS	81.1667	Female	I	Right	MSS
T2250	HPFS	62.0833	Male	III	Left	MSS
T628	HPFS	52	NA	NA	Right	MSS
T3721	NHS	76.75	Female	III	Left	MSI
T3261	NHS	70.4167	Female	II	Right	MSS
T4679	NHS2	59.25	Female	III	Left	NA
T3725	NHS	75.1667	Female	I	Right	MSS
T3601	HPFS	83.4167	Male	III	Right	MSS
T3701	NHS	75.6667	Female	II	Left	MSI
T3654	NHS	77.3333	Female	I	Right	MSS
T4519	HPFS	66.5833	Male	III	Right	MSS
T251	NHS	58.1667	Female	I	Left	MSS
T3319	NHS	74.8333	Female	IV	Left	MSI
T164668	NHS	66.25	Female	II	Right	MSS
T2283	HPFS	70.4167	Male	NA	Right	MSS
T372	NHS	68.4167	Female	III	Left	MSS
T2430	NHS	66.9167	Female	III	Left	MSS
T3002	NHS	76.4167	Female	I	Right	MSS
T1748	HPFS	85.0833	Male	II	Left	MSI
T676	HPFS	76.5833	Male	III	Right	MSS
T2371	NHS	72.25	Female	IV	Left	MSS
T2342	NHS	52.9167	Female	NA	Right	MSS
T2998	NHS	75.4167	Female	III	Right	MSS
T2372	NHS	64.5833	Female	II	Left	MSS
T224	NHS	72.5	Female	I	Left	MSS
T2260	HPFS	65	Male	III	Left	MSS
T123	NHS	50.4167	Female	III	Right	MSS
T3246	HPFS	65.6667	Male	IV	Left	MSS
T312708	NHS	72.8333	Female	III	Right	MSS
T1170	NHS	78.5	Female	III	Right	MSS
T193667	NHS	73.0833	Female	II	Right	MSS
T2438	NHS	56.5	Female	II	Right	MSS
T2413	NHS	56.1667	Female	II	Right	MSS
T1236	NHS	66	Female	I	Right	MSS
T341	NHS	66.5833	Female	II	Right	MSI
T3244	HPFS	65	Male	II	Left	MSS
T3105	NHS	83.9167	Female	III	Left	MSS
T2967	NHS	72.4167	Female	II	Right	MSS
T694	HPFS	47	Male	IV	Right	NA
T354207	NHS	81.8333	Female	IV	Left	MSS
T441	HPFS	49.8333	Male	II	Right	MSS
T283200	NHS	64.8333	Female	I	Right	MSS
T323	NHS	61.0833	Female	IV	Right	MSS
T3632	HPFS	71.0833	Male	II	Left	MSS
T292	NHS	59.5	Female	II	Left	MSS
T4528	HPFS	76.25	Male	III	Right	MSS
T3307	HPFS	60.5833	Male	II	Right	MSS
T57	NHS	49.6667	Female	III	Right	MSS
T3650	NHS	72.1667	Female	II	Right	MSS
T3709	NHS	77.4167	Female	III	Right	MSS
T3420	HPFS	65.4167	Male	III	Right	MSS
T4677	NHS2	48	Female	NA	Left	NA
T4686	NHS2	55	Female	II	Left	NA
T262114	NHS	84.5	Female	IV	Right	MSS
T3226	HPFS	74.5	Male	III	Right	MSS
T204	NHS	65.4167	Female	IV	Right	MSS
T3710	NHS	76.1667	Female	II	Right	MSS
T242594	NHS	84.3333	Female	IV	Left	MSI
T84	NHS	53.9167	Female	II	Right	MSS
T2954	NHS	77.75	Female	I	Left	NA
T3084	NHS	68.25	Female	III	Left	MSS
T3603	HPFS	74.8333	Male	NA	Left	NA
T3690	NHS	73.25	Female	II	Left	MSI
T42	NHS	55	Female	II	Right	MSS
T4703	NHS2	52.8333	Female	I	Right	NA
T4654	NHS2	54.4167	Female	III	Right	NA
T3726	NHS	71.0833	Female	III	Left	MSS
T1198	NHS	72.5833	Female	II	Left	MSS
T3301	HPFS	61.5833	Male	IV	Left	MSS
T3187	HPFS	68.3333	Male	IV	Right	MSS
T2959	NHS	69.5833	Female	IV	Right	MSS
T1187	NHS	64.75	Female	III	Left	MSS
T1190	NHS	64.9167	Female	II	Left	MSS
T142275	NHS	61	Female	I	Left	MSS
T4699	NHS2	53.6667	Female	I	Right	NA
T3557	HPFS	64.1667	Male	IV	Right	MSS
T2247	HPFS	70.9167	Male	II	Left	MSS
T2624	NHS	72.9167	Female	II	Left	MSI
T3642	NHS	62.75	Female	II	Right	MSS
T2941	NHS	73.0833	Female	II	Left	NA
T3502	HPFS	78.1667	Male	III	Right	MSS
T2997	NHS	77.75	Female	II	Right	MSS
T605	HPFS	79.9167	Male	I	Right	MSI
T1208	NHS	56.9167	Female	III	Left	MSS
T1849	HPFS	79.25	Male	III	Left	MSI
T3539	HPFS	80.5	Male	NA	Right	MSS
T613	HPFS	69.3333	Male	III	Left	MSI
T2263	HPFS	79.1667	Male	II	Left	MSS
T2999	NHS	68.8333	Female	II	Right	MSS
T649	HPFS	54.3333	Male	II	Left	MSI
T2583	NHS	54.3333	Female	I	Right	MSS
T521	HPFS	62.8333	Male	I	Right	MSS
T259101	NHS	68.0833	Female	II	Left	MSS
T1224	NHS	57.75	Female	III	Right	MSS
T2635	NHS	72.9167	Female	III	Right	MSS
T3112	NHS	79.75	Female	IV	Right	MSS
T2987	NHS	71.5	Female	IV	Left	MSS
T1854	HPFS	79.9167	Male	I	Right	MSS
T62	NHS	73.75	Female	II	Left	MSS
T2760	NHS	67.0833	Female	III	Right	MSS
T4672	NHS2	53.9167	Female	II	Left	NA
T2768	NHS	64.8333	Female	II	Right	MSS
T4664	NHS2	43.0833	Female	III	Left	NA
T4704	NHS2	54.6667	Female	I	Left	NA
T2448	NHS	68.5833	Female	II	Left	MSI
T2373	NHS	65.5833	Female	I	Right	MSS
T335135	NHS	85.6667	Female	I	Left	MSI
T3080	NHS	74.6667	Female	I	Left	MSI
T4490	HPFS	73.5	Male	III	Left	NA
T3641	NHS	67.75	Female	I	Left	MSI
T186	NHS	70.75	Female	II	Right	MSS
T670	HPFS	74.0833	Male	I	Left	MSS
T306558	NHS	80.4167	Female	I	Left	MSI
T101930	NHS	83.5833	Female	I	Left	MSS
T1249	NHS	59.9167	Female	I	Right	MSS
T3602	HPFS	84.9167	Male	IV	Left	MSS
T4738	NHS2	52	Female	II	Right	NA
T4533	HPFS	82.4167	Male	II	Left	MSS
T3046	NHS	60.1667	Female	III	Right	MSS
T2929	NHS	60.4167	Female	III	Right	MSS
T2945	NHS	81	Female	II	Left	NA
T2766	NHS	72.75	Female	IV	Left	MSS
T191861	NHS	82.5	Female	III	Left	MSS
T462	HPFS	75	Male	II	Left	MSS
T3273	NHS	71	Female	II	Left	MSS
T3549	HPFS	87.9167	Male	NA	Left	MSS
T4484	HPFS	87	Male	IV	Right	NA
T115875	NHS	73.5	Female	III	Left	MSI
T3094	NHS	74	Female	II	Left	MSI
T196972	NHS	69.5833	Female	III	Left	MSS
T4525	HPFS	64.9167	Male	II	Left	MSS
T3035	NHS	63.4167	Female	II	Right	MSS
T162841	NHS	81.5833	Female	II	Left	MSI
T66	NHS	67.1667	Female	III	Right	MSS
T4675	NHS2	57.3333	Female	IV	Left	NA
T3205	HPFS	74.3333	Male	IV	Right	MSS
T2261	HPFS	68.9167	Male	I	Right	MSS
T3351	HPFS	81.75	Male	IV	Left	MSS
T140903	NHS	72.1667	Female	II	Left	MSI
T1808	HPFS	NA	NA	NA	NA	NA
T359705	NHS	80.6667	Female	III	Left	MSS
T526	HPFS	74.8333	Male	II	Right	MSS
T2361	NHS	69	Female	IV	Left	MSS
T3669	NHS	78.25	Female	III	Left	MSI
T302124	NHS	74.1667	Female	III	Left	MSI
T4522	HPFS	69.6667	Male	III	Right	MSS
T2759	NHS	64.9167	Female	I	Right	MSS
T3414	HPFS	72.75	Male	I	Right	MSS
T430	HPFS	67.4167	Male	III	Right	NA
T3655	NHS	83.75	Female	NA	Right	NA
T2980	NHS	68.3333	Female	III	Right	MSS
T4520	HPFS	86.75	Male	III	Left	MSS
T4702	NHS2	44.75	Female	NA	Right	NA
T306835	NHS	71.75	Female	II	Right	MSS
T4687	NHS2	51.25	Female	NA	Right	NA
T1154	NHS	68.3333	Female	III	Left	MSI
T348	NHS	63.75	Female	III	Right	MSS
T4673	NHS2	54.1667	Female	III	Right	NA
T423	HPFS	66.6667	Male	III	Right	MSS
T345	NHS	70	Female	II	Left	MSI
T2974	NHS	70.9167	Female	I	Left	MSS
T3323	HPFS	77.0833	Male	NA	Left	NA
T214060	NHS	76.8333	Female	II	Left	MSS
T3090	NHS	66	Female	II	Right	NA
T3321	NHS	71.1667	Female	II	Left	MSI
T2352	NHS	64.3333	Female	NA	Right	NA
T3436	HPFS	79.0833	Male	II	Left	MSS
T2365	NHS	69.8333	Female	II	Right	MSS
T360138	NHS	73.4167	Female	III	Left	MSS
T1232	NHS	72.6667	Female	III	Right	MSS
T3671	NHS	71.25	Female	IV	Left	MSS
T3720	NHS	66.8333	Female	II	Left	MSS
T3503	HPFS	68.1667	Male	II	Left	MSI
T4745	NHS	70.0833	Female	II	Left	NA
T3451	HPFS	82.5	Male	I	Left	MSI
T604	HPFS	74.4167	Male	II	Right	MSS
T3639	NHS	76.1667	Female	I	Left	MSS
T4500	HPFS	79.1667	Male	NA	Left	MSI
T4635	NHS	79.1667	Female	III	Right	NA
T2966	NHS	55.75	Female	III	Left	MSS
T614	HPFS	70.8333	Male	I	Left	MSS
T412	NHS	69.0833	Female	IV	Left	MSS
T4749	NHS	79.1667	Female	I	Left	NA
T391	NHS	65.1667	Female	IV	Right	MSS
T3399	HPFS	72.5833	Male	IV	Right	MSS
T182584	NHS	74.75	Female	III	Right	MSS
T3668	NHS	59.0833	Female	III	Right	MSS
T3306	HPFS	68.0833	Male	III	Right	MSS
T3705	NHS	65.4167	Female	I	Left	MSS
T4506	HPFS	81.25	Male	I	Right	MSS
T3729	HPFS	83.9167	Male	I	Left	MSI
T201263	NHS	72.5	Female	I	Left	MSS
T1743	HPFS	72.1667	Male	II	Right	MSS
T1772	HPFS	51.75	Male	III	Right	MSS
T3271	NHS	69.8333	Female	I	Left	MSS
T4696	NHS2	59.6667	Female	II	Left	NA
T4491	HPFS	75.8333	Male	NA	Left	MSS
T124	NHS	56.5	Female	II	Right	MSS
T2955	NHS	68.6667	Female	II	Left	MSS
T298	NHS	71.5	Female	IV	Left	MSS
T569	HPFS	83.1667	Male	III	Right	MSS
T112874	NHS	79.0833	Female	II	Right	MSS
T3698	NHS	71.3333	Female	II	Right	MSS
T167191	NHS	77.4167	Female	II	Right	MSS
T267922	NHS	76.9167	Female	I	Left	MSI
T241681	NHS	81.75	Female	III	Right	MSS
T3005	NHS	62.5	Female	II	Left	MSI
T1153	NHS	66.4167	Female	I	Right	MSS
T4547	NHS	85	Female	II	Left	NA
T270033	NHS	68.75	Female	I	Right	MSS
T2455	NHS	66.5	Female	II	Right	MSS
T3714	NHS	70.3333	Female	III	Right	MSS
T4736	NHS2	53.0833	Female	II	Right	NA
T251808	NHS	77.25	Female	I	Right	MSS
T3309	HPFS	56	Male	III	Left	MSS
T3676	NHS	69.9167	Female	II	Left	MSI
T4529	HPFS	78.25	Male	NA	Right	MSS
T2643	NHS	66.4167	Female	IV	Left	MSS
T3182	HPFS	82.5	Male	NA	Left	MSS
T1156	NHS	70.25	Female	II	Right	MSS
T3336	HPFS	73.1667	Male	I	Left	MSS
T578	HPFS	61.0833	Male	II	Left	MSS
T22	NHS	74	Female	I	Left	MSS
T608	HPFS	76.8333	Male	I	Left	MSS
T3534	HPFS	73.5833	Male	III	Left	MSS
T2769	NHS	67.4167	Female	III	Left	MSS
T4537	HPFS	75.5	Male	I	Right	MSS
T3479	HPFS	80.5833	Male	I	Left	MSS
T3644	NHS	62.0833	Female	II	Right	MSS
T3645	NHS	84.75	Female	III	Left	MSS
T4534	HPFS	72.8333	Male	I	Left	MSS
T3443	HPFS	62.5833	Male	III	Right	MSS
T3024	NHS	73.1667	Female	I	Left	MSI
T2225	HPFS	82.5	Male	IV	Left	MSS
T3056	NHS	72.8333	Female	III	Left	MSS
T3088	NHS	77.8333	Female	II	Left	MSS
T302873	NHS	63.0833	Female	IV	Left	MSS
T4743	NHS	64.4167	Female	IV	Left	NA
T3147	HPFS	87.6667	Male	IV	Right	MSS
T2764	NHS	82	Female	IV	Right	MSS
T3338	HPFS	69.8333	Male	IV	Right	MSS
T3047	NHS	65.4167	Female	III	Left	MSI
T2258	HPFS	84.4167	Male	II	Left	MSS
T3724	NHS	78.9167	Female	II	Left	MSI
T252	NHS	56.0833	Female	I	Right	MSS
T291403	NHS	85.75	Female	III	Left	MSS
T595	HPFS	70.5833	Male	III	Right	MSS
T4487	HPFS	81.5	Male	II	Right	NA
T2991	NHS	64.75	Female	I	Left	MSS
T298012	NHS	84.1667	Female	II	Right	MSS
T3099	HPFS	79.3333	Male	NA	Left	MSS
T4430	HPFS	83.0833	Male	IV	Left	MSI
T4514	HPFS	82.5833	Male	II	Right	MSS
T3558	HPFS	76.8333	Male	NA	Left	MSS
T636	HPFS	50.25	Male	I	Left	MSS
T233366	NHS	80	Female	III	Left	MSI
T2417	NHS	58.75	Female	II	Left	MSS
T3092	NHS	68.0833	Female	I	Left	MSS
T3611	HPFS	69.0833	Male	NA	Right	MSS
T3108	NHS	73.25	Female	III	Left	MSS
T3038	NHS	77.9167	Female	I	Right	MSS
T4505	HPFS	81.6667	Male	NA	Right	MSS
T270588	NHS	68.1667	Female	II	Right	MSS
T280091	NHS	86.3333	Female	III	Left	MSI
T3019	NHS	72.5833	Female	II	Left	MSS
T3505	HPFS	86.3333	Male	III	Left	MSS
T237641	NHS	69.1667	Female	II	Left	MSS
T4718	NHS	85.1667	Female	II	Right	NA
T1194	NHS	76.9167	Female	I	Left	MSS
T3262	NHS	80.9167	Female	II	Left	MSI
T4693	NHS2	59.0833	Female	I	Right	NA
T3298	HPFS	48.4167	Male	IV	Right	MSS
T3174	HPFS	74.4167	Male	IV	Left	MSI
T2971	NHS	80.0833	Female	II	Left	MSI
T4668	NHS2	48.4167	Female	III	Right	NA
T3064	NHS	75.5	Female	II	Left	MSI
T2420	NHS	68.5833	Female	III	Left	MSS
T1760	HPFS	78.0833	Male	III	Right	MSS
T3110	NHS	60.3333	Female	I	Right	MSS
T3202	HPFS	69.4167	Male	II	Left	MSI
T3021	NHS	76.5833	Female	III	Left	MSI
T4497	HPFS	78.8333	Male	I	Left	NA
T3422	HPFS	74.6667	Male	II	Left	MSI
T4435	HPFS	83.4167	Male	III	Left	NA
T3427	HPFS	84.4167	Male	II	Right	MSS
T3610	HPFS	79.5	Male	NA	Left	MSS
T231	NHS	58.75	Female	IV	Left	MSS
T4502	HPFS	86.4167	Male	III	Left	NA
T4556	NHS	64.25	Female	III	Left	NA
T4694	NHS2	55.5	Female	I	Right	NA
T464	HPFS	69.8333	Male	I	Left	MSS
T426	HPFS	67	NA	NA	Right	MSS
T3033	NHS	76.9167	Female	IV	Left	MSS
T2289	HPFS	88.0833	Male	II	Left	MSS
T3240	HPFS	61.8333	Male	II	Right	MSS
T3442	HPFS	85.3333	Male	III	Right	MSS
T3699	NHS	79.6667	Female	I	Left	MSS
T4680	NHS2	48.75	Female	I	NA	NA
T3144	HPFS	77.25	Male	III	Right	MSS
T3643	NHS	73.9167	Female	I	Left	MSI
T3079	NHS	74.0833	Female	I	Right	NA
T3045	NHS	65.25	Female	I	Left	MSS
T236849	NHS	82.75	Female	III	Right	MSS
T4562	NHS	74.6667	Female	II	Left	NA
T3260	NHS	78.0833	Female	I	Left	MSS
T4648	NHS2	54.0833	Female	III	Right	NA
T2995	NHS	65.4167	Female	IV	Right	MSS
T2926	NHS	66.0833	Female	III	Right	MSS
T4485	HPFS	76.9167	Male	III	Right	NA
T214901	NHS	83.3333	Female	I	Right	MSS
T3437	HPFS	68.5833	Male	I	Left	MSS
T3335	HPFS	80.25	Male	NA	Right	MSS
T4508	HPFS	78.9167	Male	I	Left	MSS
T2940	NHS	77.8333	Female	III	Left	MSI
T2931	NHS	76.75	Female	II	Left	MSS
T3188	HPFS	91.0833	Male	II	Right	MSS
T626	HPFS	56.9167	Male	NA	Left	MSS
T4531	HPFS	89.9167	Male	NA	Left	MSS
T196513	NHS	83	Female	II	Right	MSS
T4513	HPFS	84.5833	Male	I	Left	NA
T3152	HPFS	71.1667	Male	III	Left	MSI
T3091	NHS	65.9167	Female	II	Left	MSI
T2973	NHS	76.4167	Female	III	Left	MSS
T3688	NHS	77.0833	Female	II	Right	MSS
T3433	HPFS	82.5833	Male	III	Left	MSS
T4503	HPFS	82.5833	Male	I	Right	MSS
T3118	NHS	71.8333	Female	II	Right	MSI
T336	NHS	65.5833	Female	IV	Right	MSS
T3535	HPFS	84.9167	Male	II	Left	MSI
T3263	NHS	70.0833	Female	II	Left	MSI
T3499	HPFS	79.5833	Male	I	Left	MSS
T3509	HPFS	75.1667	Male	II	Right	MSS
T4747	NHS	74.6667	Female	III	Left	NA
T3446	HPFS	70	Male	I	Left	MSS
T3658	NHS	83.75	Female	II	Left	MSI
T4507	HPFS	78	NA	NA	Left	NA

## Sheet: Table S2
Table S2: Clinical, pathological, and molecular characteristics of colorectal cancer cases according to alkylating mutational signature.
		Alkylating mutational signature (ordinal quartiles Q1 to Q4)
Characteristic*	All cases (N = 882)	Q1 (N = 220)	Q2 (N = 221)	Q3 (N = 221)	Q4 (N = 220)	P value†
Sex						0.002
Female (NHS)	544 (62%)	152(69%)	147 (67%)	120 (54%)	125 (57%)
Male (HPFS)	338 (38%)	68 (31%)	74 (33%)	101 (46%)	95 (43%)
Mean age ± SD (years)	69.5 ± 9.2	68.6 ± 9.8	70.4 ± 8.1	71.2 ± 9.3	68.0 ± 9.2	<0.001
Year of diagnosis						<0.001
1995 or before	220 (25%)	52 (24%)	44 (20%)	48 (22%)	76 (35%)
1996-2000	221 (25%)	47 (21%)	57 (26%)	55 (25%)	62 (28%)
2001-2005	260 (29%)	65 (30%)	62 (28%)	76 (34%)	57 (26%)
2006-2014	181 (21%)	56 (25%)	58 (26%)	42 (19%)	25 (11%)
Family history of colorectal cancer in first-degree relative(s)						0.35
Absent	703 (80%)	178 (81%)	181 (82%)	167 (76%)	177 (80%)
Present	179 (20%)	42(19%)	40 (18%)	54 (24%)	43 (20%)
Tumor location						<0.001
Cecum	163 (19%)	32 (15%)	43 (19%)	47 (21%)	41 (19%)
Ascending to transverse colon	280 (32%)	90 (41%)	84 (38%)	52 (24%)	54 (25%)
Descending to sigmoid colon	249 (28%)	62 (28%)	57 (26%)	70 (32%)	60 (27%)
Rectum	189 (21%)	35 (16%)	37 (17%)	52 (24%)	65 (30%)
Tumor differentiation						<0.001
Well to moderate	781 (91%)	186 (88%)	184 (85%)	208 (96%)	203 (96%)
Poor	74 (9%)	25 (12%)	32 (15%)	8 (4%)	9 (4%)
AJCC disease stage						0.051
I	208 (26%)	50 (25%)	48 (22%)	58 (29%)	52 (26%)
II	267 (33%)	69 (34%)	89 (42%)	61 (30%)	48 (24%)
III	238 (29%)	58 (29%)	56 (26%)	59 (29%)	65 (33%)
IV	101 (12%)	25 (12%)	21 (10%)	23 (11%)	32 (16%)
MSI status						<0.001
Non-MSI-high	649 (83%)	130 (72%)	135 (66%)	187 (96%)	197 (98%)
MSI-high	134 (17%)	51 (28%)	70 (34%)	8 (4%)	5 (2%)
CIMP status						<0.001
Low/negative	605 (81%)	131 (76%)	123 (63%)	167 (92%)	184 (94%)
High	139 (19%)	42 (24%)	71 (37%)	15 (8%)	11 (6%)
Mean LINE-1 methylation level ± SD (%)	64.2 ± 10.1	65.6 ± 10.0	65.4 ± 10.0	63.5 ± 10.0	62.6 ± 10.1	0.007
KRAS mutation						0.002
Wild-type	407 (56%)	99 (60%)	121 (66%)	96 (53%)	91 (48%)
Mutant	314 (44%)	67 (40%)	61 (34%)	86 (47%)	100 (52%)
BRAF mutation						<0.001
Wild-type	659 (84%)	144 (78%)	149 (74%)	176 (89%)	190 (94%)
Mutant	128 (16%)	41 (22%)	53 (26%)	21 (11%)	13 (6%)
PIK3CA mutation						0.89
Wild-type	627 (85%)	144 (85%)	165 (85%)	159 (85%)	159 (83%)
Mutant	115 (15%)	25 (15%)	28 (15%)	29 (15%)	33 (17%)
* Percentage indicates the proportion of patients with a specific clinical, pathologic, or molecular characteristic among all patients or in strata of alkylating mutational signature.
† To compare categorical data between the ordinal categories of alkylating mutational signature, the chi-square test was performed. To compare continuous variables, an analysis of variance was performed.
Abbreviations: AJCC, American Joint Committee on Cancer; CIMP, CpG island methylator phenotype; HPFS, Health Professionals Follow-up Study; LINE-1, long-interspersed nucleotide element-1; MSI, microsatellite instability; NHS, Nurses’ Health Study; SD, standard deviation.

## Sheet: Table S3
Table S3: The alkylating mutational signature and colorectal cancer-specific and overall survival
	No. of cases	No. of events	Univariable HR (95% CI)	Multivariable HR (95% CI)a	MSI-adjusted model
					HR (95% CI)b	Proportion of effect mediated by MSI % (P)
Colorectal cancer-specific survival
Alkylating signature
Q1	220	55	1 (referent)	1 (referent)	1 (referent)
Q2	221	53	0.99 (0.68-1.45)	1.06 (0.72-1.56)	1.11 (0.75-1.63)	No intermediation
Q3	221	58	1.06 (0.72-1.54)	1.15 (0.79-1.69)	1.07 (0.73-1.57)	53.8% (0.055)
Q4	220	80	1.52 (1.07-2.16)	1.47 (1.02-2.10)	1.35 (0.94-1.94)	21.8% (0.041)
Per quartile increment			1.15 (1.03-1.29)	1.14 (1.01-1.28)	1.10 (0.97-1.23)	27.8% (0.002)
Ptrend‡			0.015	0.036	0.13
Overall survival
Alkylating signature
Q1	220	120	1 (referent)	1 (referent)	1 (referent)
Q2	221	125	1.11 (0.83-1.48)	1.10 (0.82-1.48)	1.11 (0.83-1.49)	No intermediation
Q3	221	137	1.19 (0.90-1.59)	1.16 (0.87-1.55)	1.11 (0.83-1.49)	29.6% (0.002)
Q4	220	142	1.29 (0.97-1.70)	1.26 (0.94-1.68)	1.20 (0.90-1.60)	20.9% (0.001)
Per quartile increment			1.09 (0.99-1.19)	1.08 (0.98-1.18)	1.06 (0.96-1.16)	25.6% (0.045)
Ptrend‡			0.069	0.11	0.25
a The multivariable Cox regression model initially included sex, age, year of diagnosis, family history of colorectal cancer, current smoking status (never smoking, past smoking, 1-14 pack-years, 15-24 pack-years, ≥25 pack-years), alcohol consumption (women: 0 to <0.15, 0.15 to <2.0, 2.0 to <7.5, and ≥7.5 g/d; men: 0 to <1, 1 to <6, 6 to <15, and ≥15 g/d), tumor location, tumor differentiation, d…
b The multivariable Cox regression model was further adjusted for microsatellite instability based on the final modela.
‡ Ptrend value was calculated across the ordinal quartiles of alkylating mutational signature in the Cox regression model.
Abbreviations: CI, confidence interval; HR, hazard ratio; MSI, microsatellite instability.

## Sheet: Table S4
Table S4: Clinical characteristics of CRC patients at diagnosis according to availability of whole-exome sequencing data in NHS/ HPFS
Characteristic	whole-exome available (N = 900)	whole-exome unavailable (N = 3955)	P value†
Sex			<0.001
Female (NHS)	546 (61%)	2845 (72%)
Male (HPFS)	354 (39%)	1110 (28%)
Mean age ± SD (years)	69.5 ± 9.2	66.7 ± 11.1	<0.001
Year of diagnosis			<0.001
1995 or before	221 (25%)	1505 (38%)
1996-2000	225 (25%)	785 (20%)
2001-2005	260 (29%)	761 (19%)
2006-2012	181 (20%)	904 (23%)
Tumor location			0.008
Cecum	167 (19%)	501 (16%)
Ascending to transverse colon	282 (32%)	883 (28%)
Descending to sigmoid colon	252 (28%)	998 (32%)
Rectum	194 (22%)	781 (25%)
Dietary intake (means)
Total red meat, servings/day	0.75 ± 0.56	0.79 ± 0.60	0.12
Processed red meat, servings/day	0.25 ± 0.29	0.27 ± 0.33	0.15
Unprocessed red meat, servings/day	0.50 ± 0.38	0.52 ± 0.40	0.24
Poultry, servings/day	0.38 ± 0.31	0.37 ± 0.30	0.85
Fish, servings/day	0.25 ± 0.26	0.26 ± 0.25	0.58
† To compare categorical data between two groups, the chi-square test was performed. To compare continuous variables, an analysis of variance was performed; Abbreviations: AJCC, American Joint Committee on Cancer; HPFS, Health Professionals Follow-up Study; NHS, Nurses’ Health Study; SD, standard deviation.

## Sheet: Table S5
Table S5: Whole-Exome Sequencing Metrics for NHS and HPFS FFPE Samples
ID	Target_20X_Normal	Target_20X_Tumor	Mean_Target_Normal	Mean_Target_Tumor	Library_size_Normal	Library_size_Tumor
T1155	74.2	70.6	45.11	42.1	14445084	15892927
T82	75.3	71.2	50.68	42.15	16857136	14527228
T77	76.9	71.7	48.28	42.32	20499355	20418952
T573	82.9	70.1	65.12	42.66	22008215	14487591
T185	76.2	67.3	53.43	42.79	21116181	18525710
T592	75.9	73.3	50.21	42.86	21221694	14741225
T639	73.9	73.4	43.87	43.17	15033721	14144768
T183	65.5	67.8	39.62	43.27	12976836	14710932
T278	79.2	70.8	58.15	43.45	25206179	27387335
T1237	76.2	62	58.4	43.62	30202997	24498830
T409	29.9	76.6	15.76	44.13	5024447	14275556
T2183	39.1	39.1	46.39	44.56	18192307	22432022
T516	69.8	75.4	39.69	44.59	13049246	15748861
T562	82.8	74.5	62.49	44.8	27193392	15030106
T597	84.1	72.2	66.06	44.82	26538133	17680526
T87	46.1	73	22.53	44.98	7390719	15670600
T2267	62.9	66.4	36.78	45.1	23166113	27575207
T495	73.8	71.2	51.75	45.11	20992266	14641327
T563	85.8	73.8	75.4	45.45	30399590	16260966
T3697	80.8	69.9	59.9	45.51	33792973	26864986
T3082	88.1	69	84.27	45.52	38872577	21047175
T1841	87.1	77.4	86.89	45.6	67410743	15165942
T451	84.3	72.4	66.88	45.78	23144067	17184948
T679	80.6	71.8	66.41	45.8	26720422	16985936
T574	89.1	74.3	101.87	45.93	51878302	22602600
T4492	49.5	75.8	23.25	46.07	12036578	19140079
T246	84.9	74.7	69.13	46.26	30202739	15284672
T238	55.5	74.9	28.17	46.61	8976942	15934005
T10	85.5	74.1	71.61	46.63	25159290	21998019
T2774	70.4	70	51.49	46.79	18056824	15779406
T2296	83.3	75.9	61.86	46.96	26235841	19312088
T3241	84.6	74.9	68.84	47.42	38122272	24323291
T286	86.8	76.4	81.49	47.43	42951178	16710333
T3537	71	75.3	43.78	47.58	15683518	19176102
T360	83	74.6	64.21	47.6	21758988	16050440
T635	84.5	74.7	73.32	47.83	28522950	17682741
T2930	92.6	72.3	143.06	48.08	65940377	23908122
T276	15.9	77	11.71	48.14	58773911	19132609
T28	67.5	71.5	39.86	48.22	18817455	16749081
T61	83.3	75.2	62.79	48.34	27779351	24856473
T3337	89.2	75.9	99.57	48.42	60839544	16059912
T2421	78.5	73.1	58.84	48.61	23290493	16917964
T206	85.5	72.9	72.17	48.91	34793871	31262939
T2950	85	76.5	73.62	48.94	29945345	27590578
T211	83.7	75.3	68.02	48.99	23539486	15728491
T85	80.4	75.7	56.26	49.12	18188165	18420164
T2639	80.7	75.7	57.21	49.28	20047324	15817495
T58	83.2	76	63.84	49.52	31800899	22300811
T3220	81.4	77.9	56.75	49.53	19406005	17548764
T2399	84.8	77.7	68.17	49.81	31729245	23181666
T3151	90.06	77.1	121.88	50.05	90799134	19920625
T1192	87.4	77	90.06	50.08	38540666	18027736
T3428	88.8	76	88.87	50.19	67680763	20835047
T1243	83.7	78.8	59.63	50.23	24293697	19189663
T347	87	77.7	82.99	50.48	33832215	18403824
T1233	84.8	75.6	71.89	50.54	25896937	17211670
T226	84.5	76.8	75.26	50.66	33765102	17982908
T3145	87.4	76.8	82.41	50.78	37556937	31668440
T2341	84.2	67.4	66.78	50.79	29906128	31437922
T530	81.2	74.3	57.19	50.8	19049633	16764344
T166	82.9	74.6	74.72	50.93	30492413	17767151
T2337	89.6	77.6	96.71	51.08	38446581	27063346
T588	81.9	75.7	62.32	51.11	25846015	17966095
T389	64.8	78	34.61	51.14	11235258	21152332
T2275	79.1	79.8	50.65	51.64	19073468	21886861
T478	52.4	77	25.75	51.82	8211610	17901113
T1201	84.3	77.3	74.37	51.89	28557624	18574005
T139	85	64.3	80.47	51.99	34865095	32022469
T198	81.2	77.5	58.24	52.19	20782785	17608990
T435	71.4	76	46.62	52.4	16898703	18564245
T3447	48.7	78.1	27.22	52.51	10988904	20975763
T425	84.6	78.6	72.78	52.71	25218621	17386491
T125	85.8	78.5	73.43	52.78	40292710	33713506
T322	82	78.7	61.31	52.79	27270454	18598185
T533	75.3	76.1	47.94	52.97	16552245	19547507
T141234	79.9	75.8	55.64	52.98	20349555	17289373
T3667	50	77.1	26.08	53.03	9666338	19579651
T3689	90.4	79.9	119.1	53.49	90728594	41869877
T512	75.8	75.8	52.02	53.51	18166717	18671403
T3684	83.6	78.7	68.71	53.75	30060402	19595122
T3315	86.5	80.1	78.05	53.8	32705579	23805690
T379	86.5	79.9	80.99	53.87	37485582	22387365
T575	76.9	78.5	54.91	54.09	19588989	20460047
T646	83.7	77	79.38	54.1	32304068	18611109
T634	80.1	78.8	56.63	54.24	22406848	19148596
T3189	70	79.4	40.69	54.36	13255794	19551699
T2578	80.8	78	58.75	54.51	29100901	24801646
T4652	80.6	83.1	57.47	54.51	28612439	21839138
T91	81	78.6	64.21	54.62	24631700	23479098
T673	81.8	65.1	83.49	54.98	51460881	29119285
T3050	80.2	78.8	57.38	55.08	19525845	21580927
T2407	78.8	75.1	63.79	55.1	28580987	20421715
T1199	88.7	79.7	91.45	55.5	40671186	21172530
T2195	84.8	79.4	68.63	55.71	43585632	32898492
T109	82.2	80.2	69.27	56.11	27755802	18660754
T549	81.2	78.8	57.88	56.23	21794739	20918909
T291	81.3	78.7	68.31	56.34	34161222	22946744
T3221	87.6	77.9	92.51	56.36	56970441	44255022
T31	80.6	82.6	53.9	56.48	20197498	23287241
T4730	47.8	80.7	22.06	56.57	10635519	21547715
T1178	89.3	78.9	97.38	56.63	58575529	40177710
T272	82	75.7	75.19	56.66	34161308	22963534
T3410	57.4	79.1	29.79	56.72	9743418	19534928
T3254	81.1	78.2	59.62	56.79	25515608	29967641
T2671	74.3	77.5	51.27	56.95	19977199	21840381
T2202	89.6	80.5	95.76	56.99	46240272	39094735
T3299	19	48.3	14.01	57.02	8547542	32986564
T96	80.15	80.64	55.96	57.02	19371111	19443186
T486	82.9	79.4	67.02	57.1	24543296	19529617
T446	86.4	81.1	78.42	57.16	34877020	23865077
T270	87.3	77.3	79.78	57.17	25761555	32818220
T222	82.6	79.1	63.88	57.24	25565079	30550602
T21	82.2	79.8	66.23	57.31	32082568	27837367
T3018	82.4	79.7	63.09	57.31	24139737	20719388
T524	76.9	75.3	59.79	57.36	27102000	32772521
T2667	81.8	81	57.48	57.73	35490130	26144905
T133	88	78.7	84.28	57.75	34132111	22904244
T339	48.4	43.2	74.35	57.75	42626040	23861373
T3124	89	80.9	109.37	57.84	57034591	36252384
T2699	76.3	76.8	56.32	57.94	20822677	25066752
T90	86.6	79.4	81.62	57.98	35925079	28661597
T262	82.9	80.7	61.08	57.99	25001416	29250653
T413	92.2	75.8	122.39	58.04	56571154	39188855
T3727	82.2	81.1	61.25	58.52	23610140	21978905
T3219	69.8	80.4	41.76	58.54	21862895	29134891
T3409	85.2	80.8	72.96	58.69	25662182	20374687
T528	81.7	80.8	62.35	58.85	27474411	23484335
T76	85.2	80.2	71.96	59.04	42997480	33788655
T1764	85.14	78.74	77	59.23	30753459	21031351
T1211	83.4	75.1	73.81	59.25	34727211	19942551
T1749	81.7	81	71.76	59.25	25968696	22611689
T3311	84.4	81.2	73.11	59.29	39228180	24814606
T89	87	80	87.97	59.35	42723326	25309020
T383	80.1	82	58.01	59.49	27874272	26856655
T2979	84	78.6	69.58	59.51	33537584	27827974
T38	85.3	81.6	72.37	59.57	30598626	22388718
T3449	89.8	82.1	99.03	59.67	58094148	28610840
T14	92.3	81.4	144.81	59.7	75865581	31543447
T256	83.5	80.1	68.18	59.89	26650199	24180626
T3520	75.8	63.9	88.81	60.08	55286873	52044041
T2948	87.1	79.9	82.76	60.12	49547409	35534846
T2457	88.4	81.6	90.28	60.15	47359575	20904218
T1216	86.9	81.2	72.58	60.18	36644853	30130505
T593	88.3	83.1	90.02	60.21	49580973	21465265
T101	89.9	81.4	94.43	60.26	37597899	29537176
T2434	87.8	81.6	87.18	60.3	61257301	33254279
T24	80.1	79.6	57.72	60.43	22687531	21499193
T2354	80.5	82.5	57.38	60.53	19071869	24184703
T224049	83.2	83.1	61.67	60.54	37221015	40106530
T3304	87.3	81.3	82.21	60.63	35679436	31477072
T108	89.3	81.5	90.54	60.67	55060184	32937663
T497	78.8	81.3	56.46	60.67	25574989	25938244
T3405	84.5	80.9	68.69	60.73	35899522	26236161
T92	85.5	81.2	73.24	60.73	25998691	22702772
T2252	88.3	79.3	91.43	60.9	80794300	42287345
T2443	84.1	79.3	81.28	61.03	43739669	33706528
T2281	82.9	80.5	69.59	61.31	30415590	30651570
T3184	74.4	81.9	52.19	61.55	21277945	21115831
T113	60.4	82.7	30.97	61.77	12750766	26023102
T3181	78.5	80.5	62.7	61.77	23943248	24052442
T687	82.2	83.2	62.21	61.88	26031192	23188433
T2392	42.3	44.9	61.19	61.92	34029710	25993639
T4732	84.2	82.7	72.19	61.92	35254088	23945784
T112	72.6	82.4	47.58	62.14	15817999	28626512
T2265	80	80.8	63.24	62.21	23711222	29785692
T4538	85	81.8	68.57	62.22	32267003	25939637
T73	81.7	82.5	61.51	62.43	28731117	21374834
T3234	81.5	82.8	57.72	62.48	23003064	27230348
T86	33.2	82.7	17.76	62.48	7073361	22623873
T1183	88.8	80.6	90.81	62.66	42586284	27021499
T3397	89	82.7	93.32	62.68	51080622	26516447
T3316	88.4	83.1	80.8	62.71	48551049	38558933
T1797	89.3	83.4	99.77	62.78	54775738	27720860
T2369	85.4	81.7	71.47	62.81	32266605	22419258
T1205	85.5	83	78.46	62.82	37914153	23506126
T419	88.2	83.4	90.85	62.84	36615425	22828877
T241	87.6	81.8	82.86	62.99	51044909	39049385
T287	87.7	82.8	88.9	63.01	39810554	21461246
T3232	86.8	81.4	80.52	63.04	46926990	27729771
T674	84.2	82.5	63.54	63.15	30970225	27963753
T3172	78	81.8	51.69	63.29	18609935	22511665
T390	83	80.9	73.87	63.37	42762964	24511274
T4681	89.1	82.9	133.35	63.5	57669824	24772175
T4733	45.1	78.8	21.03	63.51	10485195	23607992
T255	83.7	81.1	71.68	63.52	29983408	30925649
T519	84.4	79	72.31	63.61	37283455	23286598
T2582	83.3	81.6	76.84	63.63	44925123	25746496
T3489	83.6	73.1	83.02	63.67	52352780	48632861
T3683	89.8	81.2	89.09	63.7	53077951	44332700
T43	86.6	83.3	77.13	63.88	32065811	28156544
T253	84.7	81.4	96.3	64.31	48197628	25107826
T655	89.8	79.3	100.22	64.35	55331430	33049723
T3680	89.4	83.4	95.61	64.39	82971507	53732103
T2641	84.9	83	69.97	64.53	28044895	25653976
T556	88.1	83.7	90.18	64.53	39266523	31306189
T106	86.5	83.3	79.81	64.58	34184851	36425024
T2388	90.6	83	105.13	64.68	52060718	26750452
T496	88.4	82.8	90.54	64.69	51125299	28905197
T559	88	83.8	74.47	64.72	36365883	25498054
T304	80.1	81.9	63.77	64.81	21113319	20985073
T3439	88.7	84	94.43	64.85	49733831	33543219
T3194	74.5	82.4	46.72	64.9	15994835	26380622
T2269	83.95	83.11	65.16	64.96	22895250	23233107
T3011	82.2	81.8	64.99	65.03	36706527	30185913
T2429	82.4	83.2	62.15	65.04	24319945	28900960
T2427	58.7	84	30.97	65.07	11799669	32646365
T358480	85.8	81.6	77.71	65.32	69229591	62038045
T606	84.5	78	70.46	65.32	43847017	52570376
T684	61.9	83.9	32.29	65.36	17297080	27718276
T111	85.2	83.1	71.63	65.52	27405808	25059886
T3140	87.2	79.2	87.01	65.64	39503869	34207689
T1221	88.8	82.4	90.85	65.7	45584874	36229493
T1230	83.5	82.7	70.97	65.74	25920370	33049187
T81	88.3	82.7	91.8	65.74	58700600	33301504
T316	84.3	84.7	62.83	65.83	46561968	29232517
T429	86.9	83.9	78.51	65.83	48962538	43549850
T2423	83.5	84.6	69.49	65.89	43428461	57354712
T657	84.9	83.2	66.08	65.96	29514448	30103798
T276701	85	83.9	71.38	66.02	50414271	40231179
T1222	87.6	83.6	86.63	66.06	35954962	26605548
T645	85	83.3	78.2	66.16	32620525	27136242
T1227	87	84.6	76.33	66.22	58481815	47689777
T3049	83	83.6	62.59	66.22	28482060	45249789
T1195	83.9	82.5	73.98	66.26	29444710	28263824
T2416	88	82.8	97.37	66.32	42943716	23686750
T693	83.9	83.8	69.36	66.5	25821295	23740014
T3227	81.4	80.7	64.34	66.58	26352679	30773938
T240	85	83.5	75.36	66.63	37519108	33947622
T491	90.2	83.8	111.12	66.66	48398587	30132105
T3101	86.7	84.7	82.13	66.71	58944923	35204894
T60	87.4	84.4	83.97	66.72	44450443	29607596
T3170	80	83.2	62.6	66.9	27391732	26700979
T3269	82.3	80.5	65.73	66.91	25312415	21881049
T492	86.1	81	79.01	67	34546312	33870124
T54	82.8	80.1	78.71	67.15	29509000	25181473
T307	85.3	83.8	73.03	67.27	37025839	26961516
T442	84	84.8	64.5	67.27	26293943	28147278
T1246	86.9	80.3	78.29	67.45	33803459	29724001
T2946	91.2	83	123.48	67.53	77347617	63684513
T2214	78.3	85.3	52.06	67.82	29891598	27441376
T2288	83.5	81.1	80.39	67.96	40494065	39629218
T1747	88.6	84.4	99.8	67.97	43650958	42877130
T4720	80.5	83.9	57.82	67.97	24768677	33258117
T197	83.3	85.5	63.6	68.09	29548344	37111055
T330	81.9	85.1	58.51	68.16	31362012	34159622
T2410	76.6	84.3	50.68	68.23	17945883	31064175
T213	87.3	84.1	79.94	68.27	47393513	28450354
T3666	43.6	86	21.21	68.29	21952584	33287180
T620	84.1	83.1	73.9	68.45	30435654	27399323
T1193	85.7	84.7	72.79	68.51	29513667	25807138
T1755	72.9	82.6	47.91	68.51	16379993	31137733
T3048	87.5	83.4	90.3	68.6	62978338	37867774
T50	85.2	83.9	79.86	68.6	35394207	31247139
T3432	84.9	85.5	71.21	68.74	38231500	53602199
T33	85.2	83.6	71.64	68.9	33027321	32357647
T692	86.5	84.1	83.13	68.9	31848895	31902154
T3496	84.9	85.6	66.93	68.98	38011206	40450212
T3010	88.2	82.7	103.71	69.13	43976247	28616961
T1767	87	83	83.98	69.31	35809725	35563961
T228	87.8	83.5	86.94	69.44	41958177	34605054
T481	80.9	84.1	61.81	69.47	28578524	31112488
T2674	89.9	84.4	106.81	69.59	57589006	26702464
T615	85.7	84.5	72.5	69.59	34968759	38508571
T546	85.8	84.5	81.48	69.73	40767884	26710672
T3248	82.2	84.4	65.76	69.79	37541168	29550504
T1245	84.1	84.1	75.92	69.86	45721145	32003599
T2936	85.6	82.1	85.11	69.91	38075919	43614300
T2262	87	84.4	83.21	69.92	79165558	57414985
T3440	89.7	85.1	90.7	69.92	39328562	40033899
T3123	87.3	83.9	83.19	70	38554745	49049065
T1241	87	85.2	89.43	70.03	41635679	38561859
T607	86.6	83.3	79.29	70.12	32871362	34219323
T63	80.9	80.2	73.76	70.25	29871640	31668280
T1160	86	84.5	76.27	70.32	26234550	23789592
T4723	85.3	82.8	97.54	70.37	47884065	42591891
T344	84.8	83.5	72.15	70.41	25174620	26753056
T1202	89.1	84.3	106.76	70.7	50491443	51781748
T1803	90.7	85.2	103.62	70.7	66136146	50569838
T4724	59.6	82.4	30.86	70.72	39357535	34043680
T1798	84.1	83.5	77.17	70.73	42604704	30129407
T30	83.1	84	68.7	70.75	31561467	27263328
T3237	79.2	85.1	54.63	70.79	24919968	32953520
T2762	89.5	85.1	110.18	70.8	74145234	44427980
T250	80.1	84.3	54.56	70.82	30034079	31705473
T197908	84.5	83.6	77.71	70.92	42851076	25254888
T4705	73.5	78.9	49.65	70.98	22668387	27671190
T1167	84.8	84.6	76.23	70.99	32378667	34400609
T647	85.3	82	82.95	70.99	34030349	37558512
T2257	87.3	85.6	86.85	71.01	63445413	45900923
T4665	80.9	80.1	67.54	71.06	30621333	28766976
T3704	89	83.9	108.67	71.13	73051655	39890666
T55	88.1	85.1	89.4	71.14	46853294	35882229
T2397	78.9	82.6	57.65	71.18	28007543	27763947
T378	87.9	85	94.16	71.19	52984372	35382267
T4437	87.3	83.3	99.29	71.27	43379541	28258406
T3209	80.9	83.2	54.64	71.28	20345547	34113494
T1204	88.8	84.5	90.97	71.31	50107761	40513898
T4739	88.8	84.7	84.84	71.34	43494128	55035610
T331889	84.3	85.5	65.22	71.35	58361018	64689772
T2398	87.1	86.5	74.26	71.45	33310170	46719671
T640	86.7	84.6	84.33	71.48	59637087	29686972
T366793	85.9	82	88.03	71.76	72594810	70024095
T3430	83.8	85.1	65.36	71.99	29178440	38166599
T123338	64.5	84.1	32.92	72.01	10711817	27865240
T663	80.8	84.9	58.97	72.01	25790840	29555500
T2934	87.6	82.9	88.13	72.06	59146302	45573923
T466	70.9	78.2	52.75	72.11	30269089	36774279
T2259	77	79.3	56.52	72.12	26017023	32468825
T3604	84.1	85.3	77.94	72.17	44662346	34085663
T295702	87.5	85.7	80.71	72.22	73169072	66561476
T356	85.4	87	69.44	72.31	43185766	34612669
T3527	89.9	84.6	123.74	72.39	91140692	45416748
T1161	88.7	84.3	91.85	72.41	40893852	28007634
T311196	90	83.5	105.76	72.42	61770361	58908324
T3288	87.9	83.9	90.96	72.43	43585877	30449449
T3330	90.1	84.9	120.39	72.62	59918731	27229481
T1848	84.9	84.4	81.44	72.63	39730794	26900327
T1191	87	83.5	85.6	72.75	55053554	52355845
T293	86.1	85.2	69.09	72.86	35147602	39613181
T3102	79.3	85.3	57.84	72.9	39278243	33342807
T83	85.7	84.6	83.29	72.93	47300701	38007420
T2359	88.7	85.5	86.08	72.95	49071349	39802017
T3016	86.5	85.4	90.25	72.99	57377379	38206962
T691	79.5	81.3	60.73	72.99	27802264	47121799
T353	90.3	87	99.49	73.01	45512577	35257813
T3104	90.3	84.9	100.77	73.02	78282580	67470851
T116	79.6	85.6	57.53	73.21	20133957	31369884
T2394	83.9	86.9	68.22	73.25	32268277	26310898
T3305	86.7	84.3	79.13	73.33	32291567	26970509
T477	86.2	84	86.39	73.42	34559908	26368264
T2564	86.6	85.3	84.33	73.58	36893473	35175615
T3169	75.6	84.7	51.42	73.7	21882256	27669821
T1791	88.5	85.6	102.18	73.72	57269122	42055135
T4565	84.1	82.8	76.94	73.9	27929037	38239416
T344232	82.1	85.9	60.08	73.92	27418278	38189419
T2621	82.5	85.9	58.53	73.93	28736273	29478624
T3660	87.5	86	86.57	73.93	46571142	36117558
T1262	85.2	85.5	72.54	73.96	30743472	38834667
T2647	89.4	84.8	98.52	74.38	52049749	38246993
T2565	86.8	86.2	86.5	74.42	41706843	42000232
T587	83	79.1	71.08	74.42	50466948	64207173
T1794	86	85.9	82.65	74.45	59131239	47616304
T2952	86.7	84.3	94.83	74.57	51503530	48206691
T229	86.9	86	86.8	74.59	45731604	31826754
T662	84.1	85.1	75.39	74.59	31590712	36599309
T437	70.1	85.9	40.36	74.65	13312862	26600287
T444	77	82.8	51.48	74.66	17465388	29397893
T610	87.1	84.1	86.85	74.73	40798569	33123531
T2366	87.5	86.4	82.84	74.74	29129465	25586335
T3398	86.4	86.1	73.59	74.78	45572082	37546938
T1742	88.1	85.9	93.52	74.79	56300070	42552056
T305	86.6	85.7	81.55	74.79	41957495	40006178
T2775	87.9	86.2	86.03	74.82	50634778	52114969
T2445	88.6	84.9	91.26	74.89	56004718	31875409
T407	87.8	86.7	88.75	75.02	46779934	42418193
T2323	85.6	85.9	84.91	75.05	46124592	33954342
T261	90	85.8	112.44	75.05	58761958	54754150
T3178	85.2	82.9	75.17	75.06	57098437	45168678
T3235	87.6	84.8	90.76	75.12	48393029	30524982
T504	87	85.8	89.4	75.13	37889646	28813039
T93	87.3	85.3	88.2	75.17	39182306	35182120
T365383	87	85.6	77.92	75.35	27488057	31419059
T195	83	86.4	62.87	75.81	30398885	31677801
T1771	86	86	78.98	75.91	37735806	36807717
T3485	88.7	86.1	105.87	76	58521619	29130849
T2992	86.7	84.6	92.49	76.21	40078227	36115353
T3706	88.9	86.5	90.81	76.21	68931935	56917684
T2303	87.2	83.7	83.7	76.23	78888749	62245508
T3651	89.9	86.8	97.33	76.37	58918271	52396217
T3270	88.3	86.5	83.47	76.41	48419504	56264213
T4671	89.1	84.3	112.23	76.53	54575279	45046029
T308390	85.1	86	77.66	76.63	70296121	68675585
T1759	91.3	85.6	116.32	76.66	68167869	50599572
T627	90.4	81.3	104.6	76.7	49922290	41750725
T2220	81.4	85.7	62.83	76.71	29788778	35527394
T3529	87.2	82.4	90.4	76.81	77218613	64318123
T1745	89.7	85.5	101.16	76.94	48187425	50767499
T3421	88.4	87	84.08	76.94	55474013	54458036
T2270	87.3	86.6	84.94	77.01	55724354	39386298
T3407	87	84.9	93.19	77.04	39610473	34037534
T402	92.1	86.7	138.36	77.1	53319731	27677285
T3637	90.3	86.4	107.09	77.15	67764018	51693196
T621	88.8	85.7	94.68	77.16	42001349	36753275
T471	85.3	84.7	75.52	77.18	32719115	33840690
T223	83.8	84.6	63.48	77.31	27470112	59770945
T2370	88.5	86.2	99.12	77.4	47628048	37253810
T3312	79.2	86.5	52	77.46	24120516	36701213
T2812	83.1	86.7	65.03	77.47	43711012	36919084
T3253	87.1	85.5	88.39	77.53	41340925	33891300
T631	91.9	86.4	142.57	77.55	86665247	53258873
T183221	86.8	86.6	76.62	77.57	69752342	74619019
T1254	86.9	86.9	78.39	77.64	32270365	26616292
T3661	69.2	81.3	53.76	77.69	29104504	44795054
T3484	88.6	86.1	100.94	77.72	82011353	68218378
T4700	83	81.7	87.34	77.72	38458386	34174341
T32	85	84.3	90.35	77.75	43730699	32888868
T354	87.5	86.6	87.14	77.78	36426603	47107907
T3673	89.4	84.7	104.23	77.87	78069161	80275869
T3621	82.9	87.3	62.23	77.89	42424984	36688958
T1250	86.9	85.6	83.72	78.03	30948817	33012851
T207430	88	82.7	90.01	78.14	56728521	49249176
T3480	88.7	80.5	96.82	78.17	49371620	35045475
T3059	85.2	86.3	71.76	78.21	44277100	39535021
T4683	83.7	81.7	89.24	78.29	44716588	35666542
T2227	89.3	87.1	96.08	78.34	52369733	38492842
T1756	84.2	86.2	68.52	78.45	26395264	37320031
T650	88.2	85	92.96	78.46	48116851	46891142
T1197	84.5	86.9	67.63	78.54	28926665	37638655
T1212	90.8	87.9	107.65	78.54	65164355	43384807
T374	85.4	86.6	73.54	78.55	40386314	31435410
T3057	84.3	86.6	67.89	78.56	30255762	37064847
T523	82.6	84.7	75.2	78.56	32100494	37922303
T202	71.6	86.7	42.07	78.7	17757191	30214926
T3431	88	85.4	83.01	78.8	43173191	49621119
T2454	86.3	85.6	84.39	78.86	61391541	58785000
T306	87.6	87.4	87.66	79.11	47215847	38826279
T4688	67.3	83.6	36.43	79.15	11975358	37683626
T2266	88.4	87.1	101.39	79.16	44845986	39031046
T2406	82.2	84.3	72.43	79.3	28409405	48756816
T3700	89.4	86.5	98.03	79.36	52870021	43612444
T1846	82.7	86.2	67.82	79.37	30782267	31758909
T3528	87.1	86.7	85.37	79.51	66545069	58499474
T2928	92	86.7	142.61	79.6	85136697	39846185
T2981	88.7	85.9	100.99	79.62	81371628	36860438
T280	88.1	86	96.21	79.76	46039709	36991836
T1251	87.5	87	84.5	79.92	43603348	38452884
T102	87.2	86.9	83.28	79.95	39910160	39586007
T2284	88.65	87.27	89.07	80.05	38491383	32545158
T3204	74	87.2	44.23	80.57	25928840	29660133
T561	82.5	86.3	60.86	80.6	20632598	33255242
T229051	85.5	85.3	79.75	80.65	66195409	70905721
T1196	82.6	86.3	64.4	80.67	63606033	52571317
T3415	89.6	85.5	105.18	80.73	86987413	68910918
T1157	87.7	86.4	85.11	80.96	62050847	55083361
T3677	86.3	87.4	77.22	81.03	68786379	58904856
T258	83.6	82.8	65.42	81.04	28475870	39618570
T683	84.3	85	73.23	81.06	29258572	44418801
T405	90.8	87	121.8	81.58	69502900	55784247
T3672	68.5	84.1	41.13	81.74	28227573	41875952
T1244	87.3	87.5	84.07	81.83	34040955	34202528
T3167	84.6	85.5	69.8	81.88	38194206	47242092
T4441	75.9	83.5	53.67	81.9	19012097	38294501
T688	83	86.8	63.33	81.9	24522650	38664441
T3653	89.7	87.6	101.34	81.93	59612497	62003511
T3417	85.3	86.5	79.74	82.18	38659869	41272263
T458	83.2	86.4	60.66	82.22	21412717	42553178
T3546	87.8	86.5	119.79	82.34	68367693	42889113
T4712	88.6	85.6	111.5	82.37	66225133	68027952
T3665	88.2	87.1	88.06	82.5	52946523	44418694
T68	88.5	87.7	95.61	82.52	44515051	37463973
T3640	86.3	86.5	82.33	82.59	37162147	36097358
T3563	88.3	86	93.57	82.69	74965056	79862099
T485	86.2	84.5	90.1	82.89	51823666	33748311
T1165	88.1	88.2	75.78	82.91	38113586	57549504
T1239	83.5	88.3	68.8	83.07	33841711	56468830
T237969	86.4	87.3	75.22	83.28	68139373	68876171
T680	86.5	86	75.1	83.3	38530493	37428235
T4657	88.9	81.2	123.35	83.32	58337590	46253577
T3004	87.3	85.6	76.45	83.33	82293849	34355332
T3696	88.6	88.7	85.63	83.52	53016788	58473504
T299	87.8	87.3	84.57	83.55	39074233	58969610
T103320	88.6	87.6	85.79	83.63	39868335	37672209
T134258	86.9	86.1	91.19	83.66	40232377	37439865
T1844	72.96	87.76	46.36	83.79	15795690	35591481
T2447	83.5	88	63.25	83.81	24164560	36582374
T227039	86.9	87.4	82.37	83.89	56183531	66808688
T4658	74.3	80.6	48.85	83.91	16500404	37852781
T343654	83.2	86.4	65.97	83.99	30110564	54024023
T328	88.6	86.8	94.33	84.01	41366778	52724325
T3512	92.9	87.1	167.42	84.19	82263255	41370562
T3242	87.3	88.6	77.24	84.28	42496000	47977363
T3058	89.8	87.83	115.15	84.36	75565599	34555136
T3340	91.1	86	120.64	84.39	84588923	61003338
T3008	49.6	55.8	64.69	84.48	31422569	38771838
T542	86.6	87.4	80.59	84.51	35913873	42947931
T3249	89.8	86.1	113.02	84.53	48588789	55190770
T352983	83.1	87.6	68.62	84.68	65717403	65939848
T3025	90.5	88	118.45	84.78	80685052	58394488
T4651	84.2	83.4	102.72	84.88	53142245	37235117
T2379	88.6	88.8	87.12	85.05	36881062	32590904
T275	84.2	84.4	83.02	85.08	60485933	38870887
T4682	83.1	86.2	86.56	85.13	36028336	36842982
T3646	87	88.3	77.97	85.25	63724668	59592288
T3450	84.4	88.1	73.61	85.68	67727459	58816985
T3053	90.1	87.2	106.27	85.71	82761595	60458512
T70	79.3	85.2	56.15	85.73	25542956	62356150
T418	87.4	87.6	88.69	85.8	46469879	49847577
T164221	88.2	87	99.52	85.84	97408342	90424316
T3225	91	85.6	124	86.01	64321382	61345769
T353622	88.1	85.9	94.93	86.1	82787297	90142563
T3624	84.7	87.6	70.98	86.12	45519008	44400382
T1762	86.2	86.5	78.13	86.14	35832799	49100309
T346942	81.8	87.3	64.14	86.22	50161221	55805366
T2458	87.9	87.7	86.19	86.32	38410511	41450125
T2976	87.9	85.9	87.24	86.61	43200099	54363367
T677	84.3	86.8	75.04	87.04	31473562	46006346
T3678	89.9	89.2	99.15	87.06	57527664	45792012
T2763	89.5	87.4	107.59	87.07	67845229	44363408
T3265	88.2	86.5	99.28	87.07	35926755	34394159
T3191	87.5	88.3	82.24	87.11	48999723	56421562
T2932	89.1	88.2	98.26	87.13	58602239	74225677
T277	89.2	88.3	92.95	87.17	45480792	47925875
T3542	83.1	87.9	69.95	87.17	65262093	61334098
T4536	85.8	88.1	68.02	87.36	33242913	68394923
T2271	87.1	88.4	78.36	87.46	54856878	58974229
T2808	88.7	87.3	103.61	87.52	57444380	42918443
T2304	85.9	87.3	77.29	87.57	64693789	69882351
T660	65.1	88.2	34.35	87.58	19117764	38112432
T2364	90.3	88	107.71	87.64	65004964	36992962
T603	89.1	87.6	95.67	87.68	52414532	39595866
T2367	85.4	88.2	70.6	87.76	38392544	40580658
T189255	89.5	88.5	102.01	87.82	68466341	60145932
T3481	85.4	88.4	77.75	88.04	61025419	52844067
T3483	87.3	88.4	83.36	88.1	63542881	60891759
T180077	86.6	86.3	84.99	88.15	84830691	86916338
T3022	90.8	87.6	130.59	88.28	72488400	53374499
T132	84.1	87.9	73.23	88.29	40292828	39982786
T4707	88.5	86.6	115.26	88.3	53706298	43675976
T2767	87.5	87.9	92.58	88.31	73421749	57659294
T3712	88.5	87.7	85.62	88.35	51042325	49303381
T1231	90.3	87.6	106.6	88.39	61943492	56853899
T2279	90	88.6	93.13	88.56	62676227	61235591
T1225	86.6	89	75.39	88.63	35599462	38192287
T3506	85.4	88.1	80.04	88.63	52960638	48183047
T3718	87.5	80.6	96.69	88.65	72319170	67341685
T3334	88.3	88.3	95.76	88.69	64292655	59636902
T352566	86.5	88.3	80.28	88.7	56781360	55107921
T1804	84	87.9	73.74	88.73	69652428	60086957
T3020	82.8	83.6	63	88.86	44045202	70252313
T3670	89.3	87.8	91.19	88.96	52131063	56745751
T230737	90.2	85.7	113.32	88.97	84216566	86339691
T18	90.4	88.8	105.94	89	70327847	60534069
T1226	88.8	88.4	91.12	89.07	52473541	59392393
T3444	93.1	87.7	162.5	89.18	87651664	122559638
T463	83.3	87.8	69.27	89.19	26654098	40427120
T4662	85.1	83.6	101.65	89.2	49868436	46064691
T1247	87.3	88.1	78.76	89.25	45158507	46605530
T295	81.8	78.5	99.28	89.3	73322086	72511875
T2400	86.8	87.9	80.72	89.34	47168199	40306483
T3523	89.5	88.7	92.42	89.36	53499137	65224042
T2984	87.5	87.4	91.43	89.38	36647849	39578075
T2765	89.7	87.5	96.63	89.58	57169420	67545587
T165	88.3	88	84	89.65	58927310	59200557
T3476	89.9	85.5	101.56	89.68	64960837	61631200
T1761	89.1	88.2	101.82	89.81	59479651	50496249
T2935	87.4	88.8	86.46	89.81	41370378	40286335
T4629	72.2	88	44.4	89.86	51805842	42631214
T2439	89.6	89	96.04	89.87	55142522	52130562
T311	91.3	85.4	129.76	89.93	90086722	57091016
T3692	88.4	87.6	90.79	90.05	62927329	62179462
T4669	80.4	83.9	68.47	90.07	32847868	34922326
T1206	90.7	89	106.44	90.12	64107264	48939183
T46	81.4	88.5	57.38	90.12	28825644	38138676
T3674	89.8	88.2	100.86	90.19	66282203	57769798
T171816	91	88.5	121.7	90.2	82636791	65228110
T498	87.5	87.7	84.6	90.21	38457051	42048363
T2380	91.4	89.3	116.09	90.22	49184096	43941998
T160282	88.2	89.1	97.58	90.27	94587387	57850791
T3029	82.4	85.9	68.77	90.29	26312108	31191251
T3267	86.5	89.1	75.7	90.38	43126757	51853622
T2982	86.9	88.3	79.33	90.4	53589839	48306500
T461	88.5	88.3	95.98	90.46	66751981	53055191
T2441	86.6	88.3	87.29	90.6	65255021	46457000
T3508	82.7	88.8	89.73	90.6	60192869	56990629
T110220	89.5	87.7	148.44	90.65	103593878	93142859
T2250	90.4	88.5	109.44	90.72	41611561	35624913
T628	90.4	89	100.84	90.76	45843893	48700016
T3721	88.4	88.9	87.29	90.82	45065717	49772554
T3261	88.8	87.9	97.2	90.84	59614987	56372257
T4679	86	84.2	100.1	90.9	42164768	41974460
T3725	89.8	89.3	108.74	90.94	63868417	52455827
T3601	85	87.8	70.8	90.98	64410530	79219077
T3701	88.7	89.3	90.36	90.99	43756368	38130970
T3654	87.2	88.1	88.27	91.11	66330902	66236122
T4519	87.4	89.3	80.39	91.24	50875597	47844540
T251	87.1	88.2	84.27	91.39	45006612	34537732
T3319	90.5	89.2	99.26	91.48	61093854	63025056
T164668	88.6	88.8	93.8	91.5	50669769	44881266
T2283	86.7	88	82.55	91.55	68465006	62913979
T372	87.1	88	83.34	91.55	44136039	41981326
T2430	84.2	87.4	77.1	91.56	30218075	34499000
T3002	88.5	88.7	93.02	91.56	58055832	47244523
T1748	91.5	89.2	120.67	91.58	55098705	38322679
T676	87.3	88.4	90.08	91.64	45744681	46131062
T2371	73.9	88.2	50.37	91.65	22887537	49178438
T2342	90	89.3	101.37	91.69	66482694	55691266
T2998	87.5	85.7	108.51	91.9	54090807	40545219
T2372	89.5	89.6	95.64	91.97	56000489	37470006
T224	88.6	88.4	89.11	91.99	68781025	54292931
T2260	88.1	88.4	87.76	92.05	38127278	47861738
T123	84.7	88.5	71.64	92.07	27454113	46277175
T3246	87.5	87.2	94.68	92.13	43288425	42712419
T312708	90.8	88.4	121.98	92.15	73465961	55601832
T1170	88.8	88.7	94.85	92.22	65993643	55659989
T193667	88.8	85.4	102.26	92.27	92981899	89181458
T2438	90.7	88.9	121.49	92.27	72767523	68472671
T2413	87.7	89.6	83.32	92.32	38907426	37732049
T1236	87.9	88.9	85.8	92.37	42305386	39848879
T341	89.8	89.1	98.27	92.44	63107793	62059261
T3244	90.7	87.6	123.72	92.59	64172967	68771456
T3105	84.7	88.6	75.47	92.61	107046330	60729408
T2967	90.6	87.8	113.22	92.71	67324897	45423300
T694	87.2	86.5	78.25	92.75	42152275	47941487
T354207	85.9	89.1	79.06	92.86	66126382	71328254
T441	87.3	88.9	145.42	92.89	86931764	38756196
T283200	87.7	87.8	88.5	92.91	74651980	76491892
T323	89.8	88.4	100.29	92.97	56122472	45669944
T3632	86.5	88	81.59	92.99	55230365	69104026
T292	87.2	88.7	81.55	93.24	47573608	40485190
T4528	88	88.6	85.81	93.24	74787396	70303213
T3307	85.7	88.3	79.13	93.28	37046172	42053801
T57	74.9	87.5	57.94	93.37	34189449	56985941
T3650	86.8	86.9	77.41	93.59	33764593	71836924
T3709	86.4	88.6	80.54	93.62	41047504	38387059
T3420	85.8	89.4	85.2	93.63	69711150	65103132
T4677	75.8	86.2	47.77	93.63	16378182	43273601
T4686	90	85.5	131.15	93.73	60631558	40837277
T262114	89.1	87.5	117.16	93.75	69051720	65040194
T3226	83	87	67.61	93.89	49596084	71896685
T204	87.96	88.87	85.45	93.92	35381783	43117340
T3710	86.8	88.9	82.56	94.21	45843814	64180631
T242594	89.7	88.5	108.35	94.25	83806467	83766257
T84	90	89	104.96	94.34	65358863	49717269
T2954	88.1	88.3	92.34	94.42	62404256	44226543
T3084	87.4	88.8	85.96	94.48	37120724	43547584
T3603	84.1	87.3	71.24	95.01	51782585	64089833
T3690	90.6	89.7	105.07	95.07	69447309	70585731
T42	91.5	89.5	127.92	95.08	60023982	53225657
T4703	88.4	84.2	120.33	95.1	50926365	46109817
T4654	82.1	85.5	89.94	95.18	48943472	45773596
T3726	91.2	90.1	110.87	95.19	67049792	63399551
T1198	92.7	87.9	139.07	95.23	61472024	55201170
T3301	84.6	87.9	69.48	95.31	25351038	41037324
T3187	90.99	88.5	118.55	95.38	154329794	69113030
T2959	90.4	87.7	108.23	95.47	71669756	50064999
T1187	88.9	89.8	87.43	95.51	58848075	64541094
T1190	89.8	89.3	104.95	95.68	49864744	52304486
T142275	89.6	87.6	101.38	95.73	74864714	55505980
T4699	86.6	85.4	92.38	95.78	40469446	46200819
T3557	92.5	88.5	156.89	95.91	91262035	54488296
T2247	91.1	89.9	111.14	96.06	63956166	50944936
T2624	89.1	89.5	93.73	96.07	81902287	71018064
T3642	83.6	75.7	126.93	96.08	87028644	73846716
T2941	91.2	89.6	108.69	96.11	52586505	50409623
T3502	83.5	89.2	65.72	96.28	33873008	48846923
T2997	83.6	88.4	66.32	96.41	30144168	79005961
T605	87.9	89.5	85.01	96.41	31605709	34585630
T1208	90.8	88.9	109.7	96.49	68235318	69581372
T1849	87.1	88.9	85.36	96.5	70419682	62269061
T3539	88.3	88.4	86.75	96.53	75006155	80187129
T613	89.29	89.9	92.03	96.56	42298342	44558980
T2263	86.1	89.6	74.65	96.6	52015558	52006902
T2999	90.47	88.93	115.72	96.65	86559650	44556769
T649	80.5	86.9	70.67	96.71	41902866	52448933
T2583	88.1	81	92.22	96.86	55651836	56104325
T521	78.2	89.4	52.5	96.95	21420809	47884138
T259101	90.5	89.1	114.44	96.97	60434763	84703264
T1224	88.1	88.5	83.75	96.98	48594922	52798728
T2635	87.5	88.2	103.57	97.03	75811125	73712544
T3112	89.3	89.1	95.92	97.26	57106587	47560573
T2987	42.2	57.8	40.79	97.36	48342770	63790179
T1854	76.5	84.2	55.56	97.37	75626530	86766076
T62	88.7	87.7	90.51	97.56	38930263	42692344
T2760	89.6	86	96.32	97.8	73719027	68645870
T4672	84.5	84.4	89.58	97.82	45043823	57943383
T2768	92.6	89.1	135.95	97.83	65471723	42176377
T4664	89.8	89.5	98.29	97.86	46935024	47703885
T4704	86	86.3	89.97	97.87	39840740	41159187
T2448	90.7	89.4	127.47	98.07	56801621	45094094
T2373	87.4	89.7	79.13	98.09	36569125	40902679
T335135	88	89.4	83.27	98.27	37046308	51978514
T3080	88.2	89.2	82.03	98.43	43035443	66375368
T4490	78.1	87.9	52.67	98.5	70892624	44024364
T3641	88.3	88.3	101.87	98.52	87070408	81093393
T186	92.9	89.4	147.38	98.63	90764791	44887510
T670	67.3	89.9	37.98	98.75	17616105	54115856
T306558	89.5	89.6	108.82	98.82	80571944	76727093
T101930	88.4	89.7	91.78	98.95	93810603	58866877
T1249	91	89.4	122.04	99.05	74755977	64977564
T3602	84.7	89.3	67.5	99.07	35716248	91412338
T4738	89.1	88.2	104.52	99.12	51349736	48985128
T4533	82.1	87	90.64	99.14	108274838	101185869
T3046	91.4	88.1	134.14	99.19	88018519	74149329
T2929	87.9	89.5	84.96	99.28	46216641	57906336
T2945	89.1	90.2	93.76	99.56	73740414	71073263
T2766	84.4	87.7	73.78	99.8	42897690	87515668
T191861	88.9	87.1	99.71	100.14	88693476	68887687
T462	88.9	88.2	99.13	100.48	47654989	64633886
T3273	86.9	89.9	81.87	100.54	49566517	52768523
T3549	88.5	89.3	90.64	100.6	61267311	71734890
T4484	89.5	88.8	80.59	100.85	40136647	46821280
T115875	89.7	89.1	112.87	100.93	67765801	81465977
T3094	88.24	89.34	102.41	100.97	62640305	57604230
T196972	90.2	89.7	109.66	101.12	71269782	72438145
T4525	87.2	90	98.49	101.13	92420912	73290873
T3035	86.4	88.1	92.78	101.14	40711457	42784756
T162841	85.3	87.9	76.79	101.27	52478252	53047430
T66	91.1	89.5	112.49	101.43	81738993	79525669
T4675	88.1	86.3	126.67	101.48	59292146	55256925
T3205	88.8	89.8	92.1	101.65	33548566	39157320
T2261	88.8	88.8	103.32	101.8	66202102	70322472
T3351	89.89	89.68	103.07	101.81	72804525	71993674
T140903	88.6	89.4	92.87	101.87	69597030	68696822
T1808	90.7	90.7	116.13	102.17	63030191	62449595
T359705	89.9	90.2	101.93	102.22	89979090	75256138
T526	88.2	85.4	95.42	102.28	60307383	66774392
T2361	89.2	89.6	97.22	102.32	42633532	62099268
T3669	90.2	89.4	115.95	102.32	68938604	61794511
T302124	89.1	89.3	113.85	102.5	68326502	72682648
T4522	87.9	89.1	95.94	102.51	114755607	105313032
T2759	87.3	88.7	102.85	102.64	81656106	70976827
T3414	90.4	89.5	95.41	102.66	55535902	66491654
T430	88.4	89.6	88.73	102.66	66333317	68458603
T3655	87.9	89.3	114.9	102.71	56901609	53125607
T2980	67.4	89.6	35.42	102.94	51790248	65438422
T4520	89.5	90	102.98	103.02	73825171	69560290
T4702	88.9	88.2	117.69	103.08	55436681	60745089
T306835	89.8	88.2	107.22	103.22	96850219	94971784
T4687	91.7	90.1	138.45	103.25	72186316	59208970
T1154	93.6	90.5	175.54	103.36	141241415	40408464
T348	88.6	86.4	87.3	103.45	32580983	60237615
T4673	86.8	87.7	106.63	103.48	57552909	50715327
T423	90.6	90	108.46	103.5	60009963	44051748
T345	87.3	89.2	83.85	103.55	36866968	62648932
T2974	91.25	90.08	115.81	103.63	69544113	58733718
T3323	90.7	89.1	120.23	103.71	56581802	60422161
T214060	88.7	88.5	96.76	103.73	85261964	61923328
T3090	91.4	90.5	119.13	103.85	63780115	73229463
T3321	90.8	89.9	117.68	103.87	78958223	65907075
T2352	88	88.6	97.94	103.91	61622135	60790264
T3436	90	88.3	101.64	104.27	58376380	43819998
T2365	81.2	89.8	58.74	104.41	29117342	46578648
T360138	88.3	90.2	88.35	104.41	41830415	46048904
T1232	78.5	90.6	51.57	104.5	29658228	68212816
T3671	87.6	88.4	96.63	104.56	47588773	60824979
T3720	91.1	89.7	116.17	104.69	84177925	81246472
T3503	93.8	89.9	176.46	104.87	87977614	57810237
T4745	87.5	88.9	91.21	104.97	72634134	61853058
T3451	90.6	90.2	121.49	104.99	80579901	70873829
T604	85.7	89.6	77.12	105.04	52640899	70996146
T3639	92.3	89.3	172.54	105.08	94806546	88818584
T4500	86.4	87.3	120.75	105.16	87675026	85223812
T4635	85.3	86.8	97.5	105.17	48663029	46584342
T2966	87.5	86.7	110.96	105.23	41037019	51095532
T614	88.6	87.2	86.13	105.3	57857882	63187745
T412	90.6	89.2	104.13	105.41	51610645	55620032
T4749	85.3	88.9	80.74	105.43	46606072	47038650
T391	90.9	90.4	102.87	105.44	59693646	55394250
T3399	89.6	89.6	108.47	105.65	47663537	46934875
T182584	89.1	89.4	103.94	105.89	66631446	52749714
T3668	90.01	89.88	121	105.99	128323061	44373812
T3306	89.18	89.38	105.1	106.26	108074211	76965682
T3705	90.2	90.7	107.19	106.3	59362292	52331276
T4506	89.4	89.4	104.84	106.67	95544040	95550799
T3729	90.9	89.4	120.06	106.84	81940213	97477064
T201263	91.2	89.8	131.28	106.91	99700663	89749611
T1743	88.61	89.66	96.32	106.96	43381610	62219429
T1772	89.1	89.8	94.25	107.03	56574001	73819497
T3271	88.4	89.6	89.98	107.04	66961730	69186821
T4696	88	88.6	95.19	107.16	43583106	45431723
T4491	88.6	89.7	95.85	107.2	87014448	70088346
T124	81.6	88.9	66.6	107.6	26873781	64535282
T2955	88.4	89.2	91.47	107.87	62400997	69782800
T298	66.9	90.2	35.48	108.04	51976277	64469320
T569	88.2	89.4	106.43	108.15	52372451	63239808
T112874	89.1	89.8	104.44	108.22	88264863	93089344
T3698	91.1	89.3	117.86	108.38	71368392	80227415
T167191	90.3	90.5	120.47	108.46	76343274	74665229
T267922	87.7	90.3	85.36	108.76	67501367	66077854
T241681	91.8	89.6	131.37	108.9	75266988	76336495
T3005	88.9	89.5	106.72	108.92	53271616	53516669
T1153	90.4	89.7	105.83	109.24	58446260	64852848
T4547	88.7	89.3	110.3	109.53	60015973	64483314
T270033	89.6	89.8	108.27	109.88	84088990	84460776
T2455	90.5	90.6	113.45	110.01	85848824	63313724
T3714	89.2	90.2	108.44	110.2	95399940	73176159
T4736	80.1	89.7	61.45	110.26	46939360	64280111
T251808	89	89.2	94.65	110.4	84165436	81423308
T3309	92.2	89.9	137.19	110.42	68887883	90472262
T3676	89.8	91.4	102.91	110.7	62817729	78271047
T4529	87	86.9	110.17	110.7	78456154	91688711
T2643	60.4	90.3	33	110.73	17011269	76806134
T3182	90.61	90.39	118.51	111.01	103806090	69967173
T1156	91.8	91.1	133	111.27	68627491	57907307
T3336	85.9	90.2	82.54	111.59	49576352	59769769
T578	90.04	91.2	102.08	112.01	101902588	83531971
T22	91.7	90.5	125.84	112.19	72570831	81193960
T608	90.2	89.9	110.51	112.43	50455899	48920869
T3534	91.7	91.3	125.47	112.5	65412791	58549222
T2769	90.47	90.27	126.64	112.66	90205885	92443960
T4537	86.7	90.3	95.75	112.88	98950483	89213883
T3479	89.5	91.4	96.25	113.05	48086041	60668108
T3644	91.3	89.9	154.45	113.18	83498855	68832038
T3645	89.3	90.9	98.53	113.4	65271982	67886560
T4534	89.5	89.2	117.69	113.61	104079736	96254033
T3443	88.9	90	92.84	113.66	88556555	88368486
T3024	91.3	90.8	111.72	113.79	74715696	65588173
T2225	91.07	90.42	120.06	113.86	67980866	80729986
T3056	85.8	84.5	115.94	114.47	116251889	94765191
T3088	86.3	90.4	78.86	114.52	54343029	90720275
T302873	89.7	91.6	98.23	114.71	84004417	74110505
T4743	86	88.6	90.81	114.9	57343511	59414816
T3147	90.34	88.86	114.17	115.27	144330565	181790777
T2764	89.4	90.7	103.32	115.46	59600546	50518949
T3338	91.3	90.8	118.82	115.47	72868463	71985768
T3047	87.5	88.7	97.67	115.48	75815121	87772961
T2258	87.1	90.9	80.92	115.87	36529588	66284427
T3724	90.76	90.37	119.94	115.87	168025604	127098659
T252	85.5	88	81.8	116.44	34378472	56701878
T291403	88.4	90.3	105.15	116.58	77571927	71016198
T595	86.9	88.9	94.33	116.7	55575877	49987505
T4487	85.1	89.1	82.48	116.78	54058090	54391513
T2991	85.6	90.5	69.12	117.18	38787083	56664833
T298012	91.1	90.5	120.16	117.23	75474146	82210392
T3099	90.8	90.88	114.3	117.8	79688901	90185589
T4430	88.1	90.5	94.86	117.89	106822248	98062722
T4514	89	90.3	90.29	118.16	37967124	73278827
T3558	88.1	91.1	84.84	118.29	52543847	68925772
T636	91.1	91.8	116.25	118.49	67481401	111843517
T233366	90.9	91.4	118.28	118.83	96175897	80355678
T2417	90.94	91.05	123.11	119.18	146786166	94808343
T3092	91.22	91.33	115.42	119.36	74479850	97396503
T3611	85.8	89.9	82.76	119.38	76445222	62952532
T3108	90.1	90.3	109.56	119.54	66355454	79103462
T3038	90.08	90.18	113.07	119.63	91452312	88989834
T4505	89	90.9	85.9	119.72	46489453	88266540
T270588	87.4	90.6	89.28	119.95	80921093	89732603
T280091	90	90.1	105.56	120.11	90712646	84006302
T3019	89.4	89.2	117.65	120.37	63132712	59955589
T3505	93	90.7	183.72	120.44	125703310	77209527
T237641	88.3	91.1	90.59	120.56	90802923	90036162
T4718	70.8	90.7	42.72	120.68	20735318	45195255
T1194	89.7	84.3	108.71	120.69	49245614	100678057
T3262	91.63	91.39	119.5	121.08	90257177	91380812
T4693	91.3	90.7	124.2	121.17	70141320	63882182
T3298	89.38	90.7	112.04	121.23	110628064	114606871
T3174	91.23	91.1	120.55	121.37	115218811	116759358
T2971	92.7	88.5	130.5	121.59	65822735	98479852
T4668	87.8	88	115.17	122.17	67377760	71158587
T3064	89.26	91.6	105.43	122.37	61724236	66528831
T2420	91.4	89	129.36	122.42	92180849	94155141
T1760	90.32	88.98	114.19	122.66	156479429	154098596
T3110	89.5	91.3	99.41	123.88	56212550	53228661
T3202	91.1	91.7	124.03	124.16	87782551	69725693
T3021	90.66	90.92	122.11	124.4	188124303	131683528
T4497	84	89.2	85.82	124.67	50821294	54274862
T3422	91.7	92	116.04	124.83	69540063	69319525
T4435	86.8	89.5	91.04	124.96	48431161	57638418
T3427	91	92.3	135.44	125.8	71031472	59611295
T3610	92	91.69	126.89	125.97	51737470	91885075
T231	90	91.7	106.86	126.61	150870641	92290224
T4502	83	89.9	69.82	126.66	47978310	57986754
T4556	73.2	89.1	51.02	127.25	18125276	64161623
T4694	89.6	90.4	96.63	127.42	40513457	61602531
T464	81	91.9	60.42	127.54	24586496	68196402
T426	88.2	91.3	95.93	127.55	68077765	77673414
T3033	90.4	90.6	125.58	127.9	94476668	73440320
T2289	91.2	91.8	125.95	128.06	79289545	75671926
T3240	88.6	86.1	105.42	128.38	50973884	89585648
T3442	86.9	91.1	81.87	129.25	77868910	70977659
T3699	90.3	91.8	119.02	129.28	109577763	84090852
T4680	85.5	89.5	87.11	129.42	36161678	59618910
T3144	86.8	91.8	81.2	129.9	75633743	75480864
T3643	89.9	90.6	118.39	130.08	80075413	87033938
T3079	83.2	91.4	61.71	130.18	35820004	89351679
T3045	86.6	91.1	86.04	130.29	78047032	78753531
T236849	89.8	91	113.42	130.49	94793450	80766967
T4562	81.1	89.7	70.42	130.71	45941931	69780227
T3260	87.8	91.1	93.87	131.15	74972273	87349194
T4648	86.2	86.9	119.36	131.51	45691064	62059895
T2995	85	91.9	74.37	131.53	60074570	66297476
T2926	90.94	91.56	122.01	132.35	133631171	129543432
T4485	83.9	88.8	86.09	132.78	57901285	58505860
T214901	88.8	92.7	87.06	133.09	59468763	59572366
T3437	85.2	92.6	75.13	134.38	63446003	50563405
T3335	85.7	92.3	75.38	135	51152292	57334734
T4508	84.7	87	113.56	135.34	93598891	94977816
T2940	90.3	91.3	113.49	136.62	92646240	112328024
T2931	92.1	92.1	133.94	137.49	76896350	74692104
T3188	89	86.4	134.88	137.77	110474139	91000623
T626	80.6	92	79.41	138.73	49575212	88288238
T4531	87.9	88.3	125.79	140.33	54237511	64566857
T196513	89.2	92.1	105.54	141.1	70450715	78259024
T4513	87.9	90.6	115.63	141.14	62788584	63494063
T3152	14.5	92.5	11.1	141.37	69910395	96664145
T3091	88	92.2	88.5	144.69	68307893	122911416
T2973	88.6	92	91.94	146.02	36518074	243020596
T3688	89.4	92	110.23	147.13	56165848	88582941
T3433	91.4	91.6	138.2	148.8	69642135	74008453
T4503	87.2	92.6	91.56	154.3	59066175	107678724
T3118	86.6	91.8	81.57	155.34	35163752	70769008
T336	87.1	92.7	76.72	155.69	51629173	83782350
T3535	93.9	92.8	165.69	159.91	87796104	122913800
T3263	89.4	92.8	104.81	161	65230439	68914145
T3499	93.2	92.2	139.07	161.68	88862931	117268181
T3509	93.4	93.3	151.74	167.55	68584870	82757969
T4747	83.4	90.8	86.75	173.21	67746884	77151863
T3446	87	93.9	83.12	173.38	43948774	83081435
T3658	91.6	93.5	139.8	179.31	128801718	132223745
T4507	83.8	93.4	75.27	189.73	55638252	114003716
